## 25 **Abstract**

### 26 **Introduction**

27 Pediatrics cancer is one of the most important life-threatening, non-communicable diseases  
28 worldwide. However, pediatric cancer patients suffer from physical disabilities associated with  
29 cancer treatment. However, there is unclear information about level of health-related quality of  
30 life and associated factors. Aimed of this study was to assess level of Health-Related Quality  
31 of Life among pediatric cancer patients.

### 32 **Methods**

33 A hospital-based Analytical cross-sectional study design with a quantitative approach was  
34 employed among 91 conveniently sampled pediatric cancer patients with their  
35 parents/caregivers. Self-administered questionnaires were used to collect data. Data were  
36 analyzed using SPSS computer software program version 25. One-way ANOVA and linear  
37 regression were used to quantify and establish an association between Childhood Deprivation,  
38 Health-Related Quality of Life, and associated factors among Pediatric Cancer Patients at 95%  
39 CI, and a 5% level of significance.

### 40 **Results**

41 Results, the response rate was 92.3% (n = 84). The most prominent kind of pediatric cancer was  
42 Acute Lymphoblastic Leukemia 30 (35.7%) and Hodgkin lymphoma 11(13%). The mean age  
43 of pediatric cancer patients was 10.26±3.90 years while 59 (70.2%) were male. In linear  
44 regression, Childhood Deprivation ( $\beta=-1.640$ ; P-value< 0.05) on PedsQL™ 4.0 and ( $\beta= -2.175$ ;  
45 P-value< 0.01) on PedsQL™ 3.0. Findings imply that decreases the level of Childhood  
46 Deprivation, the chance of improving Quality of life increases.

### 47 **Conclusion**

48 The magnitude of acute lymphoblastic leukemia is higher among pediatric cancer patients.  
49 There was a significant link between pediatric cancers and childhood deprivation and thus,  
50 compromised quality of life. Innovative pediatric cancer care policies, guidelines, and or  
51 strategies may need to be advocated to address the problem accordingly.

## 52 Introduction

53 Pediatrics cancer is one of the most important life-threatening non-communicable  
54 diseases worldwide. It has been predicted that more than 1,000 children will be diagnosed with  
55 cancer every day and 400,000 children will be diagnosed with cancer every year, most living in  
56 low- and middle-income countries [1]. Pediatric cancer patients are individuals who have been  
57 diagnosed with cancer from 0 to 18 years [2] with a survival rate of more than 80% in high-  
58 income countries and 5 to 25% in low and middle-income countries respectively [3].

59 However, little is documented about pediatric cancer patients in sub-Saharan Africa as  
60 there is no population database of pediatric cancers in Africa, making it difficult to know the  
61 true prevalence of pediatric cancers [4]. estimated a mortality rate of 4.6/100,000, from  
62 pediatric cancer with an incidence rate of 0.5 as high, with the mortality rate being twice as high  
63 for low- and middle-income countries where they are disadvantaged in terms of education,  
64 health, and standard of living [5,6].

65 Although evidence shows that the survival rate has significantly increased following the  
66 advancement of pediatric cancer therapies such as multiple chemotherapies, surgery,  
67 radiotherapy, supportive care, and bone marrow transplantation [7]. Furthermore, studies found  
68 that childhood cancer has the best 5 years relative survival rate after diagnosis and a high rate  
69 in children with retinoblastoma and ALL tumor types had more than 50% survival in Nairobi  
70 compared to Zimbabwe and Uganda, (8), and less than 18 months survival rate to Burkitt  
71 lymphoma in Tanzania [9]. Nevertheless, the prompt number of a male has been observed in  
72 many countries compared to female pediatric cancer patients most of them spend much time  
73 receiving cancer treatment approximately six months to 3 years [10], after diagnosis.

74 In Tanzania, 18.8% of pediatric cancer patients were diagnosed in 2019, with an  
75 incidence of 1.42/100,000 whereby Wilms tumor was 17.2%, retinoblastoma 16.8%, and acute  
76 lymphoblastic leukemia was 15.9%, furthermore, Burkett lymphoma and Wilm's tumor has  
77 been presented mostly in lake zone region [11]. The World Health Organization has launched  
78 the Global Initiative for Childhood Cancer (GICC) to maximize the survival rate by up to 60%  
79 by 2030, worldwide [12].

80 Despite the substantial gains in recent years, due to major support rendered by developed  
81 countries and various international organizations, to support the government in the eradication

82 of child poverty, evidence shows that human basic needs are deprived and significantly remain  
83 a major health problem among children [13]. However, there is limited published data about  
84 childhood deprivation in pediatric cancer patients worldwide, few studies reveal that in pediatric  
85 cancer patients living in the most deprived areas at diagnosis [14], and associated with poor  
86 quality of life. Furthermore, evidence shows that most pediatric patients who were diagnosed  
87 with cancer disease are hard to reach cancer treatment centers early as they should travel a long  
88 distance for care [11].

89 In Tanzania, about 88.9% of children suffer from more than three deprivations and half  
90 of them suffer from more than five deprivation including insufficient nutrition, health,  
91 protection, education, information, sanitation, water, and housing [15]. Furthermore, studies  
92 found that children living in poverty face many deprivations to their human rights, survival,  
93 health and nutrition, education, and participation [16]. In addition, a study done in Malaysia  
94 revealed that children living in poor (housing, and living conditions) and scarcity health care  
95 delivery are significantly vulnerable to physical, social, school, and emotional problems [17]  
96 which is among of the factors associated to lower mean scores of health related quality of life  
97 of pediatric cancer patients.

98 Health-Related Quality of life is defined as perceived physical, emotional, mental, and  
99 social well-being that is affected by a disease condition and its treatment [18]. WHO, Global  
100 Initiative Childhood Cancer on its strategies approach to cure all, based on improving health-  
101 related quality of life by maximizing the abilities of pediatric cancer patients to achieve  
102 individual goals while reaching productive fellows of society [4]. Furthermore, it is expected  
103 that the pediatric cancer patient should be free from the major physical and psychological  
104 challenges which will improve health related quality of life by alleviating those effects of  
105 cancer treatments such as learning difficulties, growth, and cognitive problems [19], by  
106 maximizing early interventions

107 Studies found that age at diagnosis, sex, place of residence, type of cancer disease, medical  
108 treatment, [20,21], level of education, marital status of the parents/caregiver, employment, poor  
109 housing and living standards [22], impact the perceived Health Related Quality of Life of  
110 pediatric cancer patients and their parents/caregivers in both generic core and and specific  
111 cancer module. Where Pediatrics Quality of Life Inventory (PedsQLTM) Generic core 4.0

112 measures all pediatrics with various chronic diseases and Cancer module 3.0 is the specific for  
113 pediatric cancer patients and measure the severity of the disease [18,23,24].

114 So far, some study shows there is a large disparity in quality of life between high and low-  
115 income countries. Evidence found that there is significant variation in HRQOL perceived by  
116 pediatric cancer patients and their parents on PedsQL scores between countries, whereby the  
117 US reported high scores for physical, emotional, and school functioning [25]. Despite the  
118 increased incidence of pediatric cancer, childhood deprivation and Health-Related Quality of  
119 Life (HRQoL) among pediatrics diagnosed with cancer are not known in Tanzania. This implies  
120 that there is a need to know the status of childhood deprivation and Health-related quality of  
121 life and associated factors to pediatric cancer patients in Tanzania. The importance of this study  
122 is to highlight Sustainable Development Goal number 3 (SDG3), sub-goal 3.1 (Health and well-  
123 being), which is to ensure healthy living and promote well-being for all people of all ages.

124 Tanzania is one of the developing countries with an increasing number of pediatric cancer  
125 patients in a situation MOHCDGEC has launched several initiatives to address the burden.  
126 These initiatives include modern and accurate diagnostic technologies and multimodal therapy  
127 including chemotherapy, radiotherapy, surgery and rehabilitation services to improve the  
128 quality of life of all pediatric cancer patients to ensure all requirements are easily accessed.  
129 Currently, 9 Hospitals in Tanzania provide cancer therapy including Muhimbili National  
130 Hospital which provides all modalities that are subject to increases in the survival rate of  
131 pediatric cancer patients from 0 to 5 years, where about 50% of all children diagnosed with  
132 cancer in 2019 survive, [26,27].

133 However, challenges related to diagnosis and treatment are critical, pediatric cancer  
134 patients experience stressful physical and emotional suffering that could greatly affect their  
135 well-being including lack of self-esteem, physical incapacity, and poor educational progress  
136 [28]. Furthermore, they are subjected to fear, anxiety, and depression and also weakening of  
137 immunity [28,29], related to pain, nausea and vomiting, fatigue, weakness, loss of limb  
138 function, attention deficit problems and loss of hair while on the cancer treatment period [28].  
139 Hence if the problem is left unattended, increases long-term effects and mortality. Furthermore,  
140 most of the previous studies have been conducted to establish the prevalence, incidence, needs,  
141 and concerns of childhood cancer [3,9,11,29].

142 They helped to expose early, late and long-term effects of cancer treatment, risk of secondary  
143 malignancies, to risk of recurrence and also they confront many issues during the treatment  
144 period [30], which include childhood deprivation and social problems. Furthermore, their  
145 experience has been associated with an increased risk of detrimental psychosocial effects  
146 impacting emotional health, socialization, educational and vocational achievement, and health  
147 care access [31].

148 Many questions remain unanswered regarding interrelationship issues related to Deprivation  
149 and Quality of Life in this unique group. Therefore, this study aims to assess Childhood  
150 Deprivation and Health-Related Quality of Life among pediatric cancer patients, which could  
151 help the health profession to initiate comprehensive and consistent early intervention that could  
152 improve Quality of Life.

## 153 **Methods and Materials**

### 154 **Research design**

155 It is a hospital-based, analytical cross-sectional study design with a quantitative research  
156 approach that was held to find the association between variables including childhood  
157 deprivation and HRQoL among pediatric cancer patients with their parents/caregivers

### 158 **Study setting**

159 The study was conducted in the pediatric oncology unit at Muhimbili National Hospital,  
160 which is a National referral hospital located at Ilala, Dar es Salaam Tanzania (Eastern Indian  
161 Ocean coast of Africa), with 1,500 beds capacity, attending 1,000 to 1,200 outpatients per week  
162 and admitting 1,000 to 1,200 inpatients per week. The actual data was collected at the pediatric  
163 oncology unit whereby pediatric cancer patients were found from all over the country ranging  
164 from 0 to 18 years old. It is a hub of pediatric oncology in Tanzania, with the unit attending 300  
165 to 350 new cancer children each year [26].

166 Furthermore, approximately more than 150 pediatric cancer patients attend follow-up visits  
167 at pediatric oncology units per month, this includes all from cancer Hostels and homes with a  
168 revisit plan either weekly or monthly depending on their progress and treatment schedule. The  
169 unit runs its clinic on 3 alternative days per week (Monday, Wednesday, and Friday). The study  
170 were conducted from 6<sup>th</sup> may to 30<sup>th</sup> June 2022.

## 171 **Study population**

172 The primary subjects in this study were confirmed pediatric cancer patients aged 5 to 18  
173 years who received cancer treatment at the oncology unit (clinic) after being reviewed by an  
174 oncologist and planned for treatment.

## 175 **Inclusion and exclusion criteria**

176 All pediatric patients who confirmed they had cancer disease and were on cancer  
177 treatment at the oncology clinic were included in the study aged from 5 to 18 years, and  
178 understood and communicate verbal instructions.

## 179 **Sampling and Sampling procedure**

180 The following formula adopted from Cochran (1977) was used to determine the minimum  
181 sample size (n) by mean that was required for this study. A convenient sampling technique was  
182 used to recruit pediatric cancer patients aged 5 to 18 years who already completed an induction  
183 course of cancer therapy (Tembe et al, 2021). The patient's files were used to find the diagnosis,  
184 phase, and types of cancer treatment of the child before recruitment. As shown in Fig 1.

## 185 **Variables**

### 186 **Outcome variables**

187 The two dependent variables were assessed including Health-Related Quality of Life and  
188 Childhood Deprivation among Pediatric cancer patients.

### 189 **Predictors**

190 The variables show the association on effect to dependent variable including social  
191 demographic data of Pediatric cancer patients and their Parents/caregivers and the disease  
192 profile

## 193 **Data source**

194 The study used and modified the Social demographic characteristics from Tanzania  
195 malaria indicator survey of 2017 [32] and disease status from previous source [24] [18,24,34]  
196 and Multidimensional Poverty Index(MPI) was developed by Sabina Alkire and Foster in 2007,  
197 by using demographic and health survey data from USAID and from UNICEF (Multiple  
198 indicator cluster surveys (MICS) [16] and Pediatrics quality of Life inventory (PedsQL™ 4.0

199 Generic core scale and PedsQLTM 3.0 Cancer module) from American Pediatric Cancer  
200 Association [35]

## 201 **Measures and instrumentation**

202 **Social demographic characteristics;** the data were collected using designed  
203 structured questionnaire, including pediatric cancer patients characteristic: Age, sex, level of  
204 education, place of residence and disease status. Parents/caregivers information including age,  
205 sex, level of education, employment status, marital status and commenced caring the child

206 **Childhood deprivation;** defined as lack of essential needs such as nutrition, water  
207 and sanitation facilities, shelter, access to basic health care services, education, participation,  
208 and protection leaving children not capable to enjoy the right to reach their full potentials as  
209 members of the community [32]. In this study, Global Multidimensional Poverty Index 2014  
210 (MPI) scale used to measure poverty for catching multiple childhood deprivation including  
211 education, health and standard of living. Lack of essential needs among pediatric cancer patients  
212 resulting on unable to fulfill and participate various activities as a member of community.

213 The Global Multidimensional Poverty Index2014 (MPI) scale was used to examine each  
214 person's deprivations across 10 with indicators in three equally weighted dimensions such  
215 health, education and standard of living (Nutrition, Child mortality, Cooking fuel, Sanitation,  
216 Drinking water, Electricity, Housing, Assets, Years of schooling and school attendance)  
217 Whereas each indicator is equally evaluated within its dimension, health and education  
218 indicators are weighted 1/6 each and the standard of living indicators are weighted 1/18 each.  
219 However, the normal MPI ranges from 0 to 1 (the domain was weight by using scale of 0 and  
220 1) where 0 if the pediatric cancer patient fulfils the wealth criteria and 1 when does not fulfill  
221 wealth criteria. However, the standard of living involved 2 subscales one on item 6 and second  
222 on item 7 making a total of 12 questions.

223 **Health Related Quality of life;** defined as perceived physical, emotional, mental  
224 and social well-being is affected by a disease condition and its treatment, [18]. The Pediatric  
225 Quality of Life Inventory Version 4.0. (PedsQL™ 4.0) Generic core scale, used to assess the  
226 Quality of life of pediatric patients with cancer diseases. The scale comprises with 23-item with  
227 4 components such as Physical Functioning score (8 items), Emotional Functioning score (5  
228 items), Social Functioning score (5 items), and School Functioning score (5 items). The scales



229 contained in both child report design include 5– 7 (young child), 8–12 (child), and 13–18  
230 (adolescent).

231 The child report form for children completed as self-administered interview questions.  
232 (24,37). Items are scored on a 5-point response scale where by (0 = never a problem, 1 = almost  
233 never a problem, 2 = sometimes a problem, 3 = often a problem, 4 = almost always a problem).  
234 Whereas the specific domain and entire score is calculated from the equivalent questions,  
235 ranging from 0 to 100 (0=100, 1=75, 2=50, 3=25, 4=0). Furthermore, for ages 5-7 years' items  
236 are scored on a 3-point response scale (0 = not at all, 2 = sometimes a problem, 4 = a lot of  
237 problems).

238 The PedsQL™ 3.0 cancer module will be used to obtain the subject's information  
239 regarding HRQL. The module is a multidimensional instrument having eight domains which  
240 consist of 27 items that are covered by five scales: 1 (pain and hurt-two items),2 nausea (5  
241 items), 3 procedural anxiety (3 items), 4 treatment anxiety (3 items), 5 worries (3 items), 6  
242 cognitive problems (5 items), 7 perceived physical appearance (3 items) and 8 communication  
243 (3 items). Items are scored on a 5-point Likert scale whereby (0 = never a problem, 1 = almost  
244 never a problem, 2 = sometimes a problem, 3 = often a problem, 4 = almost always a problem  
245 for the children aged 8 to 18 self-report and parent proxy report. children aged 5 to 7 years have  
246 a 3-point Likert scale, where 0=not at all, 2= sometimes and 4 =a lot. The data was collected  
247 by using a visual aid (happy face, neutral face, and sad face) for ages 5-7 years, as a tool  
248 direction. Whereas the specific domain and entire score are calculated the same as in PedsQL™  
249 4.0 [35].

250 However, both Likert was transformed and shared with all age groups to 3 Likert scales  
251 0=never a problem, 2 sometimes, and 4 almost always a problem where (0=100, 2=50, and  
252 4=0). Furthermore, scores ranged from 27 to 135 for PedsQL 3.0 cancer module and 23 to 115  
253 for PedsQL 4.0 Generic scale. Therefore, for this study, those who scored higher means have a  
254 better Quality of Life (above 69.7), and below are considered a poor quality of life [35,38],  
255 since there is no median severity of the disease

## 256 **Reliability of the study**

257 On MPI, the Exploratory factor analysis was performed for reduction and determine  
258 weights of each item set at 0.3 as recommended by previous studies [37,38]. The correlation

259 coefficient was set at a cut-off point of  $\geq 0.30$ , whereas, the Kaiser-MeyerOklin (KMO) value  
260 was set at 50% with a 5% level of significance as shown in table 3.1. 11 items were subjected  
261 to an initial solution of which two items 1 and 4 were extracted as they weighed  $< 0.3$ . The  
262 second exploratory factor analysis involved 9 items that weighed  $> 0.3$  and were for further  
263 analysis. The total variance was explained by factor analysis 3 (initial Eugen value = 13.317 and  
264 the cumulative percent = 63.646)

265 The descriptive analysis was done which was subjected to establish mean, standard  
266 deviation, percent, variance, range, and normality statistics including skewness and kurtosis.  
267 However, the data for childhood deprivation were approximately normally distributed, whereby  
268 Kolmogorov statistical value was 0.112 (DF-84), P-value  $< 0.05$  with skewness of 1.407, and  
269 kurtosis 1.381. Therefore, the non-parametric measurement was obtained and the mean was  
270 used as a central tendency to define the endpoint of childhood deprivation scores above the  
271 mean were treated as deprived or otherwise not deprived. As shown in table 3.1 mean score and  
272 standard of error for the cut point of level of childhood deprivation among pediatric cancer  
273 patients was 3.32 (0.215), with a minimum of 0 and a maximum of 8.

274 The Pediatric Quality of life, the actual Cronbach alpha for the PedsQL™ 4.0 Generic  
275 core scale was 0-0.7 and the PedsQL™ cancer module inventory were ranging from 0- 0.7. The  
276 tool was tested before conducting the study to assess it consistently, by providing a -pre-testing  
277 questionnaire in a geographical location outside of the study area, which has been sampled in  
278 the study. 16 (10%) pediatric patients with sickle cell disease were interviewed by using MPI,  
279 PedsQL™ 4.0 and PedsQL™ 3.0, was tested by using the Cronbach alpha values, which  
280 measured the internal consistency. The place of residence was used to test the tools. Both  
281 Health-related Qualities of life were excellent at Cronbach alpha 0.7. However, the MPI was  
282 excellent with Cronbach alpha ranging from 0.3-0.72 points in factor analysis after increases of  
283 illitaration to 75% in the first round, because the sample size was below 300 participants.

## 284 **Sample size**

285 The following formula adopted from Cochran 1977 was used to determine the minimum sample  
286 size (n) that was required for this study

$$287 \quad n = \frac{\sigma^2 Z^2}{e^2}$$

$$288 \quad e^2$$

289 Whereas

290  $n$  = Minimum sample size

291  $\sigma$  = standard deviation (13.965 for the children aged  $\geq 5$  years (18)

292  $z$  = significant level 1.96

293  $e$  = acceptable sampling error (3%)

294 Therefore

295  $N = (13.965 \times 1.96 / 3)^2$

296  $N$  was 83 with an attrition rate of 10% of no response, therefore the final calculation was 91.

## 297 **Analytical strategy**

298 Obtained data was managed by manually cross checked for completeness and accuracy  
299 to detect any missing information and was entered to SPSS version 25 so as to clean the data  
300 by running frequency, and to view if it is skewed or not skewed to detect any extreme value and  
301 opt the type of data analysis model. Descriptive statistics were performed to establish social  
302 demographic characteristics of pediatric cancer patients and their parents/caregivers and also  
303 were used to find the level of childhood deprivation and health related quality of life.

304 Cross tabulation of frequency and percentage of socio demographic characteristics and  
305 disease profile were performed. One-way ANOVA and independent t-test two tailed was used  
306 to find the difference between variables of sociodemographic characteristics and outcome  
307 variables. Linear regression was used to investigate the association between outcome variable  
308 and variable of interest including socio demographic characteristics and disease profile.

## 309 **Ethics approval and consent to participate**

310 Permission to conduct the study was brought from the University of Dodoma through the  
311 Institution Research Review Committee (IRRC), and the Executive director of MNH to allow  
312 the study to be conducted at the oncology unit. The informed consent form was obtained from  
313 parents/caregivers and assent was obtained from pediatric cancer patients by the Principle  
314 Investigator before being interviewed. No names of participants was appearing on the  
315 questionnaire, only numbers were coded to ensure confidentiality. The data collection  
316 procedure was conducted in an unoccupied separate room to ensure privacy. The participants

317 had the right to withdraw from the study. However, during the study, no challenge or any change  
318 arises regarding Health Related or childhood deprivation among pediatric cancer patients. Data  
319 was handled and managed securely by using a folder with a key in the IRRC computer and not  
320 shared with other users for any purpose out of the intention of this study.

## 321 **Results**

### 322 **Socio-demographic information of the pediatric cancer patients**

323 Pediatric cancer patients and their parents/carers qualified and participated in the study  
324 with a 92.3% (n=84) response rate of 91. As shown in Table 1, the mean age of 84 pediatric  
325 cancer patients was 10,263,90 with a minimum of 5 and a maximum of 18 years The most  
326 prominent age group ranged between 8 and 12 years 40.5% (n=34), as most of them were male  
327 70.2% (n=59) compared to females 29.8% (n=25). Most of pediatric cancer patients living in  
328 urban 38.1% (n=32), Rural 36.9% (n=31) and Peri-Urban 25% (n=21). Only 47.6% (n=40) of  
329 them attended school during the study compared to 52.4% (n=44) of them are not going to  
330 school, while about 63.1% (n=53) had primary school level.

331 **Table 1. Socio-demographic information of the pediatric cancer patients**  
332 **(n=84)**

| <b>Characteristics</b>       | <b>Frequency(n)</b> | <b>Percent (%)</b> |
|------------------------------|---------------------|--------------------|
| <b>Age in years</b>          |                     |                    |
| Mean(SD) 10.26±3.90          |                     |                    |
| Min 5                        |                     |                    |
| Max 18                       |                     |                    |
| <b>Age of group in years</b> |                     |                    |
| 5 to 7                       | 22                  | 26.2               |
| 8 to 12                      | 34                  | 40.5               |
| 13 to 18                     | 28                  | 33.3               |
| <b>Gender of child</b>       |                     |                    |
| Male                         | 59                  | 70.2               |
| Female                       | 25                  | 29.8               |
| <b>Place of residence</b>    |                     |                    |
| Urban                        | 32                  | 38.1               |
| Peri-urban                   | 21                  | 25.0               |
| Rural                        | 31                  | 36.9               |
| <b>School attendance</b>     |                     |                    |
| Attending                    | 40                  | 47.6               |

|                                        |    |      |
|----------------------------------------|----|------|
| Not attending                          | 44 | 52.4 |
| <b>Level of education of the child</b> |    |      |
| Not went to school                     | 18 | 21.4 |
| Kindergarten                           | 8  | 9.5  |
| Primary school                         | 53 | 63.1 |
| Secondary school                       | 5  | 6.0  |

333 **Source:** Field Data (2022)

### 334 **Socio-demographic characteristics of parents/caregivers**

335 Table 2 shows that the mean age of 84 qualified parents/carers who participated in the  
 336 study was 38.62±10.87 years, with a minimum of 18 and a maximum of 68 years. The most  
 337 conspicuous 58.3% (n=49) of parents/caregivers aged 20-39, 52% (n=44) were female and  
 338 47.6% (n=40) were male, 41.7% (n =35) were mothers. Also whom 71.6% (n=61) were married,  
 339 58.3% (n=49) had elementary school, 85.7% (n= 72) were informally employed and about  
 340 78.6% (n=66) started caring for the child before the illness. The results may indicate that the  
 341 majority of caregivers are young and capable of caring for pediatric cancer patients and  
 342 influencing the patient's good health.

343 **Table 2. Socio-demographic characteristics of Parents/caregivers (n=84)**

| Caregiver characteristics                  | Frequency | Percent     |
|--------------------------------------------|-----------|-------------|
| <b>Age in years</b>                        |           |             |
| Mean(SD) 38.62±10.87                       |           |             |
| Min 18                                     |           |             |
| Max 68                                     |           |             |
| <b>Age by the group in years</b>           |           |             |
| 10 to19                                    | 1         | 1.2         |
| 20 to 39                                   | 49        | 58.3        |
| 40 to 59                                   | 31        | 36.9        |
| 60 to 79                                   | 3         | 3.6         |
| <b>Gender</b>                              |           |             |
| Male                                       | 40        | 47.6        |
| Female                                     | 44        | 52.4        |
| <b>Marital status of the caregiver</b>     |           |             |
| Single                                     | 16        | 19.0        |
| Married                                    | 61        | <b>72.6</b> |
| Divorced                                   | 6         | 7.1         |
| Widow                                      | 1         | 1.2         |
| <b>Level of education of the caregiver</b> |           |             |

|                                                  |    |      |
|--------------------------------------------------|----|------|
| Never went to school                             | 6  | 7.1  |
| Primary school                                   | 49 | 58.3 |
| Secondary school                                 | 21 | 25.0 |
| College/university                               | 8  | 9.5  |
| <b>Employment status of the parent/caregiver</b> |    |      |
| Formal employment                                | 12 | 14.3 |
| Informal employment                              | 72 | 85.7 |
| <b>Commenced caring for the child</b>            |    |      |
| Before illness                                   | 66 | 78.6 |
| During illness                                   | 18 | 21.4 |

344 **Source:** Field Data (2022)

### 345 **Disease profile of pediatric cancer patients**

346 As shown in Table 3, the results show that the most prominent pediatric cancer was 35.7%  
 347 (n=30) acute lymphoblastic leukemia, followed by 13.7% (n=11) Hodgkin's lymphoma, and the  
 348 last one for rhabdomyosarcoma, one for primitive neuroectodermal tumor, one for endometrial  
 349 carcinoma and one for esophageal carcinoma. Tumor while most of them confirmed cancer and  
 350 started cancer treatment in MNH 89.3% (n=75). The median year of diagnosis was 2019,772.47  
 351 with a minimum of 2009 and a maximum of 2022, with the majority of pediatric cancer patients  
 352 63.1% (n=53) diagnosing cancer in 2021 and early 2022.

353 The mean time since diagnosis was 1,890.99 with a minimum of 1 and a maximum of 6  
 354 years in pediatric cancer patients, while most of them were 1 year 45.2% (n=38), 1 to 2 years  
 355 29.8% (n= 25), 3 to 4 years 15.5% (n = 13) and 5 years are only 9.5% (n = 8) since confirmed  
 356 disease. About 35.7% (n=30) of them were treated in 4 hospitals before diagnosis, 76.2% (n=64)  
 357 started cancer treatment 2 weeks after initial diagnosis, 78.6% (n=66) had received  
 358 chemotherapy, 73.8% (n=66) had received chemotherapy, 73.8% (n=64) had received cancer  
 359 treatment =62) psychological support. However, 54.8% (n=46) of pediatric cancer patients  
 360 hospitalized 1 to 3 times before 3 months, 42.9% (n=36) had stomach pain, and 36.9% (n=31)  
 361 had fever, while receiving cancer treatment. Only 44.0% (n=37) of pediatric cancer patients  
 362 attended school/university in the last 3 months.

363 The results imply that the number of children diagnosed with cancer is currently still  
 364 increasing, while the majority of them delayed the start of cancer treatment, as most of them  
 365 confirmed cancer and started cancer treatment at the National Referral Hospital, where all

366 modalities of cancer therapy are available. However, most pediatric cancer patients experience  
367 stomach pain as the main problem while receiving cancer therapy, especially chemotherapy.

368 **Table 3. Disease profile of pediatric cancer patients (n = 84)**

| Characteristics                                        | Frequency | Percent     |
|--------------------------------------------------------|-----------|-------------|
| <b>Year of diagnosis</b>                               |           |             |
| Mean(SD); 2019.77 ±2.47                                |           |             |
| Min 2009                                               |           |             |
| Max 2022                                               |           |             |
| <b>Year of cancer disease diagnosed</b>                |           |             |
| 2009                                                   | 1         | 1.2         |
| 2010-2015                                              | 2         | 2.4         |
| 2016-2020                                              | 28        | 33.3        |
| 2021-2022                                              | 53        | 63.1        |
| <b>Time since diagnosis in years</b>                   |           |             |
| Mean(SD); 1.89 ±0.99                                   |           |             |
| Min 1                                                  |           |             |
| Max 6                                                  |           |             |
| <b>Time since diagnosis by group(years)</b>            |           |             |
| <1 year                                                | <b>38</b> | <b>45.2</b> |
| 1 to 2 years                                           | 25        | 29.8        |
| 3 to 4 years                                           | 13        | 15.5        |
| ≥5 years                                               | 8         | 9.5         |
| <b>No hospitals treated the child before diagnosis</b> |           |             |
| 1                                                      | 9         | 10.7        |
| 2                                                      | 24        | 28.6        |
| 3                                                      | 21        | 25.0        |
| ≥4                                                     | 30        | 35.7        |
| <b>Diagnosis</b>                                       |           |             |
| Acute Lymphoblastic Leukemia                           | 30        | 35.7        |
| Hodgkins Lymphoma                                      | 11        | 13.1        |
| Cellular carcinoma with Xeroderma Pigmentosum          | 10        | 11.9        |
| Wilm's Tumor                                           | 9         | 10.7        |
| Burkitt Lymphoma                                       | 8         | 9.5         |
| Retinoblastoma                                         | 5         | 6           |
| Acute Amyloid Lymphoblastic                            | 4         | 4.8         |
| Osteosarcoma                                           | 3         | 3.6         |
| Rhabdomyosarcoma                                       | 1         | 1.2         |

|                                                                                         |    |      |
|-----------------------------------------------------------------------------------------|----|------|
| Primitive Neuroectodema tumor                                                           | 1  | 1.2  |
| Endometrial Carcinoma                                                                   | 1  | 1.2  |
| Oesophageal tumor                                                                       | 1  | 1.2  |
| <b>Cancer medication started after diagnosis</b>                                        |    |      |
| ≥ 2 weeks                                                                               | 60 | 71.4 |
| < 2 weeks                                                                               | 24 | 28.6 |
| <b>Treatment</b>                                                                        |    |      |
| Chemotherapy                                                                            | 66 | 78.6 |
| Combination (chemotherapy, radiotherapy, and surgery)                                   | 7  | 8.3  |
| Combination (chemotherapy and radiotherapy)                                             | 2  | 2.4  |
| Combination (chemotherapy and surgery)                                                  | 9  | 10.7 |
| <b>Hospitalization in prior 3 months</b>                                                |    |      |
| 1 to 3 times                                                                            | 46 | 54.8 |
| >3 times                                                                                | 35 | 41.7 |
| No hospitalization                                                                      | 3  | 3.6  |
| <b>Psychosocial counseling</b>                                                          |    |      |
| Received                                                                                | 62 | 73.8 |
| Not received                                                                            | 22 | 26.2 |
| <b>Activities done in the last 3 months</b>                                             |    |      |
| School/studying                                                                         | 37 | 44.0 |
| Playing/exercises                                                                       | 23 | 27.4 |
| Hospitalized                                                                            | 12 | 14.3 |
| Too ill                                                                                 | 9  | 10.7 |
| Hand capped/ cannot work                                                                | 3  | 3.6  |
| <b>Complications related to cancer treatment</b>                                        |    |      |
| Stomach pain                                                                            | 36 | 42.9 |
| Fever                                                                                   | 31 | 36.9 |
| Heart palpitation                                                                       | 7  | 8.3  |
| Anemia                                                                                  | 3  | 3.6  |
| Combination; Fever, stomach pain, heart palpitation, loss of appetite, and body malaise | 2  | 2.4  |
| Lack of appetite and fatigue                                                            | 2  | 2.4  |
| Diarrhea                                                                                | 1  | 1.2  |
| Pneumonia                                                                               | 1  | 1.2  |
| None                                                                                    | 1  | 1.2  |

369 **Source:** Field Data (2022)



370 **The proportion of the type of pediatric cancer by sex,age and**  
371 **hospitalization prior to 3 months**

372 Descriptive analysis was performed to determine the proportion of cancer type by gender,  
373 age group and hospitalization prior to 3 months in pediatric cancer patients as shown in table  
374 4-6. The findings show that males were most affected at 70.2% (n=59) compared to females. In  
375 addition, ALL was 45.8% (n=27) in males and 12.0% (n=3) and Hodgkin's lymphoma 15.3%  
376 (n=9) in males and 8.0% (n=2) most prominent in female pediatric cancer patients. In addition,  
377 the least cancer type was affected only in female pediatric cancer patients, including 4.0% (n =  
378 1) Primitive Neuro-Ectodermal tumors (PNET), 4.0% (n = 1) endometrial cancer, and 4.0% (n  
379 = 1) Esophageal tumor.

380 The proportion of cancers by age group. Results showed that pediatric cancer patients  
381 aged 8-12 and 13-18 years were most affected by ALL compared to other cancers, at 38.2%  
382 (n=13) and 42.9% (n=12), respectively. However, Hodgkin's lymphoma and Wilms' tumor  
383 affected most pediatric cancers at ages 5-7 and 8-12 years, with the same proportions of 22.7%  
384 (n=5) and 11.8% (n=4), respectively. Therefore, the most affected age group with pediatric  
385 cancer was between 8 and 12 years. In terms of hospitalization prior to 3 months, most pediatric  
386 cancer patients with ALL were admitted 1 to 3 times and more than 3 times, 39.1% (n=18) and  
387 31.4% (n=11), respectively Hodgkin lymphoma and cellular carcinoma with xerodermic  
388 pigmentosa as shown in Table .

389 **Table 4. The proportion of diagnosis by age group (years) of pediatric cancer patients n=84**

| Variable | ALL       | Retino<br>brastobl<br>astoma | wilm's<br>tumor | hodgikins<br>lymphom<br>a | Burkitt<br>lympho<br>ma | Osteo<br>sarcoma | Rhabd<br>o<br>myosar<br>coma | Cellular<br>carcinoma<br>with<br>xeroderma<br>pigmentosa | AML     | PNET    | Endom<br>etrial<br>carcino<br>ma | oesophage<br>al tumor | Total     |
|----------|-----------|------------------------------|-----------------|---------------------------|-------------------------|------------------|------------------------------|----------------------------------------------------------|---------|---------|----------------------------------|-----------------------|-----------|
| 5 to 7   | 5(22.7%)  | 2(9.1%)                      | 5(22.7%)        | 5(22.7%)                  | 2(9.1%)                 | 0(0.0%)          | 0(0.0%)                      | 2(9.1%)                                                  | 1(4.5%) | 0(0.0%) | 0(0.0%)                          | 0(0.0%)               | 22(26.2%) |
| 8 to 12  | 13(38.2%) | 1(2.9%)                      | 4(11.8%)        | 4(11.8%)                  | 2(5.9%)                 | 0(0.0%)          | 1(2.9%)                      | 5(14.7%)                                                 | 2(5.9%) | 1(2.9%) | 1(2.9%)                          | 0(0.0%)               | 34(40.5%) |
| 13 to 18 | 12(42.9%) | 2(7.1%)                      | 0(0.0%)         | 2(7.1%)                   | 4(14.3%)                | 3(10.7%)         | 0(0.0%)                      | 3(10.7%)                                                 | 1(3.6%) | 0(0.0%) | 0(0.0%)                          | 1(3.6%)               | 28(33.3%) |
| Total    | 30(35.7%) | 5(6.0%)                      | 9(10.7%)        | 11(13.1%)                 | 8(9.5%)                 | 3(3.6%)          | 1(1.2%)                      | 10(11.9%)                                                | 4(4.8%) | 1(1.2%) | 1(1.2%)                          | 1(1.2%)               | 84(100%)  |

390

391

392 **Table 5. The proportion of diagnosis by age group (years) of pediatric cancer patients n=84**

| Variable | ALL       | Retino<br>brastobla<br>stoma | wilm's<br>tumor | hodgikins<br>lymphom<br>a | Burkitt<br>lymphom<br>a | Osteo<br>sarcoma | Rhabdo<br>myosar<br>coma | Cellular<br>carcinoma<br>with<br>xeroderma<br>pigmentosa | AML     | PNET    | Endometri<br>al<br>carcinoma | oesophage<br>al tumor | Total     |
|----------|-----------|------------------------------|-----------------|---------------------------|-------------------------|------------------|--------------------------|----------------------------------------------------------|---------|---------|------------------------------|-----------------------|-----------|
| 5 to 7   | 5(22.7%)  | 2(9.1%)                      | 5(22.7%)        | 5(22.7%)                  | 2(9.1%)                 | 0(0.0%)          | 0(0.0%)                  | 2(9.1%)                                                  | 1(4.5%) | 0(0.0%) | 0(0.0%)                      | 0(0.0%)               | 22(26.2%) |
| 8 to 12  | 13(38.2%) | 1(2.9%)                      | 4(11.8%)        | 4(11.8%)                  | 2(5.9%)                 | 0(0.0%)          | 1(2.9%)                  | 5(14.7%)                                                 | 2(5.9%) | 1(2.9%) | 1(2.9%)                      | 0(0.0%)               | 34(40.5%) |
| 13 to 18 | 12(42.9%) | 2(7.1%)                      | 0(0.0%)         | 2(7.1%)                   | 4(14.3%)                | 3(10.7%)         | 0(0.0%)                  | 3(10.7%)                                                 | 1(3.6%) | 0(0.0%) | 0(0.0%)                      | 1(3.6%)               | 28(33.3%) |
| Total    | 30(35.7%) | 5(6.0%)                      | 9(10.7%)        | 11(13.1%)                 | 8(9.5%)                 | 3(3.6%)          | 1(1.2%)                  | 10(11.9%)                                                | 4(4.8%) | 1(1.2%) | 1(1.2%)                      | 1(1.2%)               | 84(100%)  |

393

394

395

396

397

398 **Table 6. The proportion of diagnosis by hospitalization before 3 months of pediatric cancer patients n=84**

| Variable              | ALL       | Retino<br>brastobla<br>stoma | wilm's<br>tumor | hodgikins<br>lymphoma | Burkitt<br>lymphom<br>a | osteosar<br>coma | Rhabdom<br>yo<br>sarcoma | Cellular<br>carcinoma<br>with<br>xeroderma<br>pigmentosa | AML     | PNET    | Endometria<br>l carcinoma | oesophag<br>eal tumor | TOTAL     |
|-----------------------|-----------|------------------------------|-----------------|-----------------------|-------------------------|------------------|--------------------------|----------------------------------------------------------|---------|---------|---------------------------|-----------------------|-----------|
| No<br>Hospitalization | 1(33.3%)  | 0(0.0%)                      | 1(33.3%)        | 1(33.3%)              | 0(0.0%)                 | 0(0.0%)          | 0(0.0%)                  | 0(0.0%)                                                  | 0(0.0%) | 0(0.0%) | 0(0.0%)                   | 0(0.0%)               | 3(3.6%)   |
| 1 to 3 times          | 18(39.1%) | 3(6.5%)                      | 4(8.7%)         | 5(10.9%)              | 5(10.9%)                | 2(4.3%)          | 1(2.2%)                  | 6(13.0%)                                                 | 1(2.2%) | 0(0.0%) | 0(0.0%)                   | 1(2.2%)               | 46(54.8%) |
| More than 3 times     | 11(31.4%) | 2(5.7)                       | 4(11.4%)        | 5(14.3%)              | 3(8.6%)                 | 1(2.9%)          | 0(0%)                    | 4(11.4%)                                                 | 3(8.6%) | 1(2.9%) | 1(2.9%)                   | 0(0.0%)               | 35(41.7%) |
| TOTAL                 | 30(35.7%) | 5(6.0%)                      | 8(9.5%)         | 11(13.1%)             | 8(9.5%)                 | 3(3.6%)          | 1(1.2%)                  | 10(11.9%)                                                | 4(4.8%) | 1(1.2%) | 1(1.2%)                   | 1(1.2%)               | 84(100%)  |

## 400 **Level of childhood deprivation**

401 A descriptive analysis was carried out, in which mean, frequency, and percentage were  
402 determined. As shown in the Fig 1, the data for the degree of childhood deprivation were  
403 approximately normally distributed, since all values above the mean were considered  
404 disadvantaged in pediatric cancer patients, since the cut-off value was 3.32. The results show  
405 that approximately 56.0% (n=47) of pediatric cancer patients were deprived.

## 406 **Mean scores of childhood deprivation by age**

407 The overall mean values are below the limit in both age categories. However, the  
408 observed differences in standard of living where the mean is above the threshold are at ages 5-  
409 7 years (3.64±1.81) compared to ages 8-12 and 13-18 years (2.44±1.54) and (2.71±1.76) or as  
410 shown in Table 7. The results suggest that most young pediatric cancer patients have a lower  
411 standard of living compared to older patients.

412 **Table 7. Mean scores of childhood deprivation by age n=84**

| Variable           | 5-7 yrs. |      | 8-12 yrs. |      | 13-18 yrs. |      | P-value |
|--------------------|----------|------|-----------|------|------------|------|---------|
|                    | Mean     | SD   | Mean      | SD   | Mean       | SD   |         |
| Total mean score   | 1.39     | 0.91 | 0.97      | 0.79 | 1.04       | 0.86 | 0.331   |
| Education          | 0.32     | 0.48 | 0.15      | 0.36 | 0.14       | 0.36 | 0.212   |
| Health             | 0.23     | 0.43 | 0.32      | 0.48 | 0.29       | 0.46 | 0.746   |
| Standard of living | 3.64     | 1.81 | 2.44      | 1.54 | 2.71       | 1.76 | 0.036   |

## 413 **Bonferroni alpha Post hoc test of childhood deprivation among** 414 **pediatric cancer patients for age n=84**

415 Multiple comparison tests in pediatric cancer patients showed a difference in significance  
416 between those aged 5-7 years and 8-12 years for standard of living, with the p-value being  
417 <0.05. However, in other domains, the observed mean difference was not statistically  
418 significant, as shown in Table 8. The results reflect that young pediatric cancer patients may  
419 deprived on standard of living.

420 **Table 8. Bonferroni alpha Post hoc test of childhood deprivation among**  
421 **pediatric cancer patients for age n=84**

| Domain | Comparison<br>(years) | MD | S.E | 95% CI |       | P-value |
|--------|-----------------------|----|-----|--------|-------|---------|
|        |                       |    |     | Lower  | Upper |         |

|                    |                   |        |       |       |      |       |
|--------------------|-------------------|--------|-------|-------|------|-------|
| Education          | 5 to 7- 13 to 18  | 0.171  | 0.107 | -0.09 | 0.43 | 0.344 |
|                    | 8 to 12-13 to 18  | 0.004  | 0.100 | -0.24 | 0.25 | 1.000 |
|                    | 5 to7-8 to 12     | -0.004 | 0.100 | -0.25 | 0.24 | 1.000 |
| Health             | 5 to 7- 13 to 18  | -0.096 | 0.125 | -0.40 | 0.21 | 1.000 |
|                    | 8 to 12- 13 to 18 | -0.058 | 0.131 | -0.38 | 0.26 | 1.000 |
|                    | 5 to7-8 to 12     | -0.038 | 0.117 | -0.32 | 0.25 | 1.000 |
| Standard of living | 5 to 7- 13 to 18  | 1.195  | 0.462 | 0.07  | 2.33 | 0.035 |
|                    | 8to 12- 13 to 18  | 0.922  | 0.481 | -0.25 | 2.10 | 0.177 |
|                    | 5 to 7- 13 to 18  | 0.273  | 0.431 | -0.78 | 1.33 | 1.000 |

422 **Source:** Field Data (2022)

### 423 **Mean score of childhood deprivation by place of residence**

424 As shown in Table 9, the mean total childhood deprivation scores by pediatric cancer  
425 patients' city of residence. The results show that the overall mean is below the cut-off (3.32).  
426 However, mean living standard scores for those living in rural areas were higher ( $3.77 \pm 1.75$ ; p-  
427 value  $< 0.01$ ) than those in urban and peri-urban areas. The finding implicates that living in rural  
428 areas could affect pediatric cancer patients, which resulted in poor quality of life.

429 **Table 9. Mean scores of Childhood Deprivation by place of residence n=84**

| Variable           | Urban |      | Peri-Urban |      | Rural |      | P-value |
|--------------------|-------|------|------------|------|-------|------|---------|
|                    | Mean  | SD   | Mean       | SD   | Mean  | SD   |         |
| Total mean score   | 0.77  | 0.74 | 0.89       | 0.75 | 1.48  | 0.89 | 0.257   |
| Education          | 0.16  | 0.37 | 0.24       | 0.44 | 0.19  | 0.40 | 0.765   |
| Health             | 0.19  | 0.39 | 0.14       | 0.36 | 0.48  | 0.51 | 0.007   |
| Standard of living | 1.97  | 1.47 | 2.81       | 1.44 | 3.77  | 1.75 | 0.000   |

430 **Source:** Field Data (2022)

### 431 **Bonferroni alpha Post hoc test of childhood deprivation among** 432 **pediatric cancer patients for place of residence**

433 Multiple comparison tests in pediatric cancer patients showed a significant difference  
434 between those living in urban-rural and peri-urban-rural areas in terms of health functioning by  
435 the Bonferroni alpha post-hoc test with an adjusted p-value of  $< 0.024$  or  $0.020$ . In terms of  
436 standard of living, the observed difference was between urban and rural. Therefore, the results  
437 suggest that pediatric cancer patients living in rural areas are disadvantaged in terms of health

438 and standard of living. In addition, no difference was observed in education as shown in Table  
439 10.

440 **Table 10. Bonferroni alpha Post hoc test of childhood deprivation among**  
441 **pediatric cancer patients for place of residence n=84**

| Variable           | Comparison       | MD     | S.E   | 95% CI |       | P-value |
|--------------------|------------------|--------|-------|--------|-------|---------|
|                    |                  |        |       | Lower  | Upper |         |
| Education          | Urban-peri urban | -0.082 | 0.112 | -0.36  | 0.19  | 1.000   |
|                    | Urban-rural      | -0.037 | 0.100 | -0.28  | 0.21  | 1.000   |
|                    | Peri urban-rural | -0.045 | 0.113 | -0.32  | 0.23  | 1.000   |
| Health             | Urban-peri urban | 0.045  | 0.122 | -0.25  | 0.34  | 1.000   |
|                    | Urban-rural      | -0.296 | 0.109 | -0.56  | -0.03 | 0.024   |
|                    | Peri urban-rural | 0.341  | 0.122 | 0.04   | 0.64  | 0.020   |
| Standard of living | Urban-peri urban | -0.841 | 0.441 | -1.92  | 0.24  | 0.180   |
|                    | Urban-rural      | -1.805 | 0.396 | -2.77  | -0.84 | 0.000   |
|                    | Peri urban-rural | 0.965  | 0.444 | -0.12  | 2.05  | 0.098   |

442 **Source:** Field Data (2022)

### 443 **Level of Health-Related Quality of Life and associated factors** 444 **among pediatric cancer patients**

445 The descriptive analysis was performed to determine the level of health-related quality of  
446 life (HRQoL), with the endpoint being the mean score from the tool such as the Pediatric  
447 Quality of Life Inventory, both the generic core scale (PedsQL™ 4.0) child report, while mean  
448 for child report (69.7) and parent proxy report (65.4). Therefore, the mean scores above the  
449 endpoint were treated with better quality of life and below the mean with poor quality of life

### 450 **Level of health-related quality of life among pediatric cancer** 451 **patients measured by (PedsQL™ 4.0) Generic core scale**

452 As shown in table 11, the results of PedsQL™ 4.0 show that the total mean scores were  
453 lower (67.79±21.63). This finding implies that pediatric cancer patients have a poor quality of  
454 life, as the overall mean scores were below the cut-off point (69.7).

455 **Table 11. Total mean scores of the Level of Health-Related Quality Life**  
456 **measured by (PedsQL™ 4.0) Generic core scale (n = 84)**

| Domain | Mean score | Median | SD | Min | Max |
|--------|------------|--------|----|-----|-----|
|--------|------------|--------|----|-----|-----|

|                         |       |        |       |       |        |
|-------------------------|-------|--------|-------|-------|--------|
| <b>Total mean score</b> | 67.79 | 75.94  | 21.63 | 18.44 | 100.00 |
| Physical functioning    | 66.74 | 78.75  | 21.06 | 18.75 | 100.00 |
| Emotional functioning   | 77.44 | 80.00  | 17.83 | 25.00 | 100.00 |
| Social functioning      | 86.73 | 100.00 | 18.97 | 30.00 | 100.00 |
| School functioning      | 40.25 | 45.00  | 28.67 | 0.00  | 100.00 |

457 **Source:** Field Data (2022)

458 **Mean scores of Health-related quality of life measured by**  
 459 **(PedsQL™ 4.0 ) Generic core scale by sex**

460 Table 13 shows that the average total scores of males compared to females were below  
 461 the cutoff point (69.7) in both the Child Report. However, only physical functioning was  
 462 statistically significant (p-value 0.039). In addition, academic performance in both males and  
 463 females was below the threshold but was not statistically significant. This finding suggests that  
 464 the quality of life of female pediatric cancer patients improved and got better.

465 **Table 13. Mean scores of Health-related quality of life measured by**  
 466 **(PedsQL™ 4.0) Generic core scale by sex (n = 84)**

| Domain                  | Male         |       | Female     |       | P-value      |
|-------------------------|--------------|-------|------------|-------|--------------|
|                         | Mean score   | SD    | Mean score | SD    |              |
| <b>Total mean score</b> | <b>65.46</b> | 21.85 | 72.08      | 21.35 | <b>0.313</b> |
| Physical functioning    | <b>63.51</b> | 19.98 | 74.38      | 21.96 | <b>0.039</b> |
| Emotional functioning   | 76.52        | 18.53 | 79.50      | 16.19 | 0.473        |
| Social functioning      | 85.68        | 19.90 | 89.20      | 16.69 | 0.440        |
| School functioning      | 38.14        | 27.82 | 45.24      | 30.57 | 0.302        |

467 **Source:** Field Data (2022)

468 **Mean scores of Health-related quality of life measured by**  
 469 **(PedsQL™ 4.0) Generic core scale for age**

470 Table 14 One-way ANOVA analysis was used to establish the relationship through mean  
 471 results of the PedsQL 4.0 Generic Core Scale for Child report by age group. The results show  
 472 that age groups (13-18 and 8-12 years) had a significant impact (M=70.00±15.32 and  
 473 73.33±10.31, respectively; p<0.01) on the health-related quality of life of pediatric cancer  
 474 patients. However, the high mean was statistically significant for physical functioning at ages  
 475 8–12 and 13–18 years (M=71.59±19.09; 71.14±19.99; p-value 0.001) compared to the 5–7

476 year-olds who reported a low (M=53.12±22.36) in children. However, with respect to school  
477 functioning, the mean was observed to be low for all age groups at ages 5–7, 8–12, and 13–18,  
478 respectively (M=15.45±23.03; 46.50±25.98 and 52.142±4.32; p-value 0.01). The finding may  
479 suggest that the child's perceived physical functioning affects the quality of life of pediatric  
480 cancer patients.

481 **Table 14. Mean Scores of PedsQL™ 4.0 Generic Core Scale for Child and**  
482 **Parents proxy by age group (n=84)**

| Domain                  | 5-7 yrs.     |       | 8-12 yrs.  |       | 13-18 yrs. |       | P-value          |
|-------------------------|--------------|-------|------------|-------|------------|-------|------------------|
|                         | Mean score   | SD    | Mean score | SD    | Mean score | SD    |                  |
| <b>Total mean score</b> | <b>57.32</b> | 12.34 | 70.00      | 15.32 | 73.33      | 10.31 | <b>&lt;0.01</b>  |
| Physical functioning    | <b>53.12</b> | 22.36 | 71.59      | 19.09 | 71.14      | 19.99 | <b>&lt;0.001</b> |
| Emotional functioning   | 76.81        | 18.09 | 78.38      | 16.45 | 76.78      | 19.73 | 0.925            |
| Social functioning      | 83.86        | 24.39 | 83.52      | 18.93 | 92.85      | 12.12 | 0.111            |
| School functioning      | 15.45        | 23.03 | 46.50      | 25.98 | 52.14      | 24.32 | <b>&lt;0.006</b> |

483 **Source:** Field Data (2022)

484 **Bonferroni alpha Post hoc test for health related quality of**  
485 **pediatric cancer patients for age**

486 Multiple comparison tests in pediatric cancer patients showed a difference in significance  
487 between those aged 5-7 years and 8-12;13-18 years for physical and academic functioning, with  
488 the p-value being <0.01. While in the parents' report, only the school function shows significant  
489 differences. However, in other domains, the observed mean difference was not statistically  
490 significant, as shown in Table 15. The results reflect that young pediatric cancer patients may  
491 face physical problems that can lead to developmental delays and limited school attendance and  
492 other problems.

493 **Table 15. Bonferroni alpha Post hoc test for health related quality measured**  
494 **by (PedsQL™ 4.0) Generic Core Scale of pediatric cancer patients**  
495 **for age (n = 84)**

| Variable             | Comparison (year) | MD     | S.E  | 95% CI |       | P-value |
|----------------------|-------------------|--------|------|--------|-------|---------|
|                      |                   |        |      | Lower  | Upper |         |
| Physical functioning | 5 to7-8 to 12     | -18.47 | 5.38 | -31.62 | -5.33 | 0.003   |
|                      | 5 to 7- 13 to 18  | -18.42 | 5.60 | -32.10 | -4.73 | 0.004   |



|                     |                   |        |      |        |        |       |
|---------------------|-------------------|--------|------|--------|--------|-------|
|                     | 8 to 12-13 to 18  | -0.06  | 5.02 | -12.32 | 12.20  | 1.000 |
| Emotion functioning | 5 to 7-8 to 12    | -1.56  | 4.93 | -13.62 | 10.49  | 1.000 |
|                     | 5 to 7- 13 to 18  | 0.03   | 5.14 | -12.52 | 12.59  | 1.000 |
|                     | 8 to 12- 13 to 18 | -1.60  | 4.60 | -12.84 | 9.65   | 1.000 |
| Social functioning  | 5 to 7-8 to 12    | 0.33   | 5.11 | -12.17 | 12.84  | 1.000 |
|                     | 5 to 7- 13 to 18  | -8.99  | 5.32 | -22.01 | 4.02   | 0.285 |
|                     | 8to 12- 13 to 18  | 9.33   | 4.77 | -2.33  | 20.99  | 0.162 |
| School functioning  | 5 to 7-8 to 12    | -31.05 | 6.76 | -47.57 | -14.53 | 0.000 |
|                     | 5 to 7- 13 to 18  | -36.69 | 7.04 | -53.89 | -19.49 | 0.000 |
|                     | 8 to 12- 13 to 18 | -36.69 | 6.30 | -9.76  | 21.05  | 1.000 |

496 **Source:** Field Data (2022)

497 MD-Mean Difference

498 **Mean scores of Health-related quality of life measured by (PedsQL 4.0)**  
 499 **Generic core scale among pediatric cancer patients by hospitalization prior**  
 500 **to 3 months**

501 Pediatric cancer patients were hospitalized more than 3 times prior to 3 months, where the total  
 502 mean scores were below  $62.23 \pm 20.15$ . The overall trend physical functioning and school  
 503 functioning decreased quality of life, as shown in Table 16.

504 **Table 16. Mean scores of Health-related quality of life (PedsQL 4.0 Generic**  
 505 **core scale) pediatric cancer patients by hospitalization before 3**  
 506 **months (n = 84)**

| Domain                  | No Hospitalization |       | 1-3 times  |       | ➤ 3 times  |       | P-value |
|-------------------------|--------------------|-------|------------|-------|------------|-------|---------|
|                         | Mean score         | SD    | Mean score | SD    | Mean score | SD    |         |
| <b>Total mean score</b> | 79.71              | 30.47 | 72.33      | 21.16 | 62.23      | 20.15 | 0.192   |
| Physical functioning    | 54.17              | 39.57 | 68.55      | 19.60 | 65.45      | 21.49 | 0.468   |
| Emotional functioning   | 73.33              | 23.09 | 80.76      | 18.82 | 73.43      | 15.57 | 0.172   |
| Social functioning      | 76.67              | 25.17 | 90.43      | 18.28 | 82.71      | 18.83 | 0.124   |
| School functioning      | 48.33b             | 34.03 | 49.57      | 27.93 | 27.31      | 24.71 | 0.002   |

507 **Source:** Field Data (2022)

508 Multiple comparison tests in pediatric cancer patients showed a difference in significance  
 509 between those admitted 1-3 times and more than 3 times for school function 3 months before

510 function by Bonferroni Alpha Post-Hoc Test with an adjusted p-value of <0.001 as shown in  
511 Table 17

512 **Table 17. Bonferroni alpha Post hoc test of PedsQL™ 4.0 cancer generic**  
513 **scale with pediatric cancer patients for hospitalization prior in 3 months (n**  
514 **= 84)**

| Variable             |     | Mean<br>D | S.E   | 95% CI |       | P-value |
|----------------------|-----|-----------|-------|--------|-------|---------|
|                      |     |           |       | Lower  | Upper |         |
| Total mean score     | 1-2 | -9.20     | 12.56 | -39.97 | 21.49 | 0.858   |
|                      | 1-3 | 0.9       | 12.68 | 30.09  | 31.89 | 0.897   |
|                      | 2-3 | -10.09    | 4.73  | -21.66 | 1.46  | 0.353   |
| Physical functioning | 1-2 | -14.38    | 12.58 | -45.14 | 16.39 | 0.770   |
|                      | 1-3 | -11.28    | 12.70 | -42.33 | 19.78 | 1.000   |
|                      | 2-3 | -3.09     | 4.74  | -14.68 | 8.48  | 1.000   |
| Emotion functioning  | 1-2 | -7.43     | 10.52 | -33.15 | 18.29 | 1.000   |
|                      | 1-3 | -0.09     | 10.62 | -26.06 | 25.87 | 1.000   |
|                      | 2-3 | -7.33     | 3.96  | -17.01 | 2.35  | 0.203   |
| Social functioning   | 1-2 | -13.77    | 11.15 | -41.03 | 13.49 | 0.662   |
|                      | 1-3 | -6.05     | 11.26 | -33.57 | 21.48 | 1.000   |
|                      | 2-3 | -7.72     | 4.19  | -17.98 | 2.54  | 0.209   |
| School functioning   | 1-2 | -1.23     | 15.97 | -40.27 | 37.80 | 1.000   |
|                      | 1-3 | 21.02     | 16.12 | -18.39 | 60.43 | 0.588   |
|                      | 2-3 | -22.25    | 6.01  | -36.95 | -7.55 | 0.001   |

515 **Source:** Field Data (2022)

516 1- No hospitalization, 2- hospitalization 1-3 times, 3-hospitalization >3 times

## 517 **Health-Related Quality of Life and associated factors among** 518 **Pediatric cancer patients**

519 As shown in Table 18, regression analysis was performed to find the association between  
520 associated factors and HRQoL of pediatric cancer patients and their caregivers using the  
521 Pediatrics Quality of Life Inventory (PedsQL™ 4.0) Generic Core Scale. The results show a  
522 significant correlation between level of education, gender and age (=5.675; P-value <0.01:  
523 =3.685; P-value <0.01: =7.719; P-value <0.01). However, childhood deprivation (= -1.640; P-  
524 value <0.05), place of residence (= -3.131; P-value <0.05), work done in the last 7 days (= -6.476;  
525 P- value <0.01). hence, the finding implies that higher education, older age, and female gender

526 increase the chance of an improvement in the quality of life. In addition, the chance of better  
527 health in pediatric cancer patients increases when childhood deprivation decreases, activities  
528 are reduced, and live in urban areas.

529

530 **Table 18: Health related quality of life and associated factors measured by**  
531 **PedsQL™ 4.0 (n = 84)**

| Variable                                | B      | T      | 95% CI  |        | P-value |
|-----------------------------------------|--------|--------|---------|--------|---------|
|                                         |        |        | Lower   | Upper  |         |
| <b>Child factors</b>                    |        |        |         |        |         |
| Childhood deprivation                   | -1.640 | -2.211 | -3.116  | -0.165 | 0.030   |
| Place of residence                      | -3.131 | -0.219 | -5.797  | -0.464 | 0.022   |
| Age of a child                          | 7.719  | 5.105  | 4.710   | 10.727 | 0.001   |
| Sex of child                            | 3.685  | 1.451  | -1.368  | 8.737  | 0.001   |
| Level of education of the child         | 5.675  | 4.395  | 3.103   | 8.246  | 0.000   |
| Work done in the past 7 days            | -6.476 | -2.530 | -11.574 | -1.378 | 0.013   |
| Psychosocial counseling                 | -7.707 | -2.818 | -13.155 | -2.259 | 0.006   |
| Types of treatment received             | -1.842 | -2.529 | -3.292  | -0.391 | 0.014   |
| Hospitalization in prior 3 months       | -2.197 | -0.621 | -9.350  | 4.957  | 0.538   |
| Most activity done in the last 3 months | 1.611  | 1.247  | -1.001  | 4.223  | 0.220   |
| <b>Caregiver factors</b>                |        |        |         |        |         |
| Level of education of the caregiver     | -3.528 | -1.556 | -8.109  | 1.054  | 0.128   |
| Caregiver employment                    | 5.763  | 1.184  | -4.076  | 15.603 | 0.243   |
| Commence caring                         | -0.417 | -0.061 | -14.117 | 13.284 | 0.951   |

532 **Source:** Field Data (2022)

533 **Level of health-related quality of life among pediatric cancer**  
 534 **patients measured by(PedsQL™ 3.0) Generic core scale**

535 The results in Table 19 show that the mean total score (69.86±25.90) perceived by  
 536 pediatric cancer patients corresponded to the cut-off point (69.7). The results suggest that  
 537 pediatric cancer patients may have a poor quality of life.

538 **Table 19 Total mean scores of Level of Health-Related Quality of Life**  
 539 **(PedsQL 3.0) cancer module (n = 84)**

| Domain                        | Mean  | median | SD    | Min  | Max    |
|-------------------------------|-------|--------|-------|------|--------|
| <b>Total mean score</b>       | 69.86 | 67.29  | 25.90 | 4.17 | 100.00 |
| Pain and hurt                 | 70.98 | 75.00  | 21.97 | 25   | 100.00 |
| Nausea                        | 76.49 | 80.00  | 18.54 | 0.00 | 100.00 |
| Procedural anxiety            | 59.92 | 58.33  | 31.49 | 0.00 | 100.00 |
| Treatment anxiety             | 84.92 | 100.00 | 23.33 | 0.00 | 100.00 |
| Worry                         | 77.48 | 75.00  | 22.73 | 0.00 | 100.00 |
| Cognitive problem             | 62.20 | 77.50  | 37.29 | 0.00 | 100.00 |
| Perceived physical appearance | 83.63 | 100.00 | 24.42 | 8.33 | 100.00 |
| Communication                 | 48.81 | 50.00  | 27.48 | 0.00 | 100.00 |

540 **Source:** Field Data (2022)

541 **Mean scores of Health-related quality of life measured by PedsQL**  
 542 **3.0 cancer module perceived by pediatric cancer patients for sex**

543 As shown in Table 20 independent t-test two tailed, the overall means are above the cut-  
 544 off point and are not statistically significant. However, for procedural anxiety, cognitive  
 545 problems, and communication, both male and female pediatric cancer patients had mean scores  
 546 below their self-perceived limits. In addition, in the parent report, the mean score is lower in  
 547 males (65.59±43.18) on cognitive function, although this was not significant. The finding  
 548 implies that most male patients have a poor quality of life compared to female patients.

549 **Table 20. Mean scores of Health-related quality of life (PedsQL 3.0 Generic**  
 550 **core scale) perceived by pediatric cancer patients for sex (n = 84)**

| Domain                  | Male  |       | Female |       | P-value |
|-------------------------|-------|-------|--------|-------|---------|
|                         | Mean  | SD    | Mean   | SD    |         |
| <b>Total mean score</b> | 70.27 | 25.48 | 71.20  | 27.02 | 0.521   |

|                               |       |       |       |       |       |
|-------------------------------|-------|-------|-------|-------|-------|
| Pain and hurt                 | 75.68 | 17.77 | 78.40 | 20.50 | 0.542 |
| Nausea                        | 71.39 | 22.27 | 70.00 | 21.65 | 0.814 |
| Procedural anxiety            | 60.45 | 31.28 | 58.67 | 32.84 | 0.541 |
| Treatment anxiety             | 83.89 | 24.84 | 87.33 | 19.56 | 0.901 |
| Worry                         | 77.68 | 20.56 | 77.00 | 27.67 | 0.485 |
| Cognitive problem             | 60.33 | 37.53 | 66.60 | 37.13 | 0.329 |
| Perceived physical appearance | 85.88 | 23.53 | 78.33 | 26.13 | 0.197 |
| Communication                 | 46.89 | 26.03 | 53.33 | 30.71 | 0.364 |

551 **Source:** Field Data (2022)

552 **Mean scores of Health-related quality of life measured by PedsQL**  
 553 **3.0 cancer module perceived by pediatric cancer patients for age**

554 As shown in Table 21 One-Way ANOVA Analysis of PedsQL Cancer Module 3.0. The  
 555 finding shows that there is an association between health-related quality of life by age group  
 556 where pediatric cancer patients ages 8-12 and 13-18 years have a high overall mean  
 557 (74.31±12.32 and 75.15±9.74, respectively) that is statistically significant (p-value 0.01). The  
 558 difference was seen in nausea (p-value 0.020), procedure anxiety (p-value 0.01), and cognitive  
 559 problem (p-value 0.000) in the child report. Therefore, the results may suggest that aging may  
 560 improve health-related quality of life in pediatric cancer.

561 **Table 21. Mean scores of Health-related quality of life measured by PedsQL**  
 562 **3.0 cancer module for age (n=84)**

| Domain                        | 5-7 yrs. |       | 8-12 yrs. |       | 13-18yrs. |       | P-value |
|-------------------------------|----------|-------|-----------|-------|-----------|-------|---------|
|                               | Mean     | SD    | Mean      | SD    | Mean      | SD    |         |
| <b>Total mean score</b>       | 58.90    | 11.37 | 74.31     | 12.32 | 75.15     | 9.74  | <0.01   |
| Pain and hurt                 | 64.77    | 23.98 | 73.89     | 22.05 | 72.32     | 19.94 | 0.296   |
| Nausea                        | 67.27    | 22.50 | 80.88     | 16.89 | 78.39     | 14.72 | <0.020  |
| Procedural anxiety            | 71.96    | 33.09 | 87.99     | 16.30 | 91.36     | 17.49 | <0.01   |
| Treatment anxiety             | 32.19    | 33.95 | 71.81     | 24.36 | 67.26     | 23.77 | <0.007  |
| Worry                         | 87.87    | 21.93 | 78.18     | 21.12 | 68.45     | 22.26 | <0.009  |
| Cognitive problem             | 23.63    | 33.45 | 71.32     | 30.28 | 81.42     | 24.18 | <0.01   |
| Perceived physical appearance | 90.90    | 18.34 | 78.18     | 27.29 | 84.52     | 24.08 | 0.159   |
| Communication                 | 32.57    | 24.92 | 52.20     | 26.29 | 57.44     | 26.18 | <0.003  |

563

564 **Bonferroni alpha Post hoc test of PedsQL™ 3.0 cancer module**  
565 **scale of pediatric cancer patients for age**

566 Table 22 Bonferroni alpha post hoc test for the PedsQL 3.0 cancer module in pediatric  
567 cancer patients aged 5-7, 8-12, and 13-18 years. The multiple comparison test revealed  
568 statistical differences between ages 5-7 and 8-13:5-7 and 13-18 for all domains except concern,  
569 with significance observed only between ages 5-7 and 13-18, with a p -score of <0.001 for  
570 procedural anxiety and cognitive problems with a p-value of <0.05 for nausea, worry, and  
571 communication. In parents/carers, post hoc tests show statistically significant anxiety, worry,  
572 cognitive, and communicative emotional functioning between children enrolled once or twice  
573 and children enrolled more than three times in relation to anxiety, worry, and communication.

574 **Table 22: Bonferroni alpha Post hoc test of PedsQL™ 3.0 cancer module for**  
575 **age 5-7, 8-12, and 13-18 (n = 84)**

| Variable                             |                    |         |       | 95% CI  |         | P-value |
|--------------------------------------|--------------------|---------|-------|---------|---------|---------|
|                                      | Comparison (years) | MD      | S.E   | Lower   | Upper   |         |
| <b>Pain and hurt</b>                 | 5 to7-8 to 12      | -9.124  | 5.993 | -23.776 | 5.528   | 0.395   |
|                                      | 5 to 7- 13 to 18   | -7.549  | 6.241 | -22.805 | 7.708   | 0.690   |
|                                      | 8 to 12-13 to 18   | 1.576   | 5.590 | -12.090 | 15.241  | 1.000   |
| <b>Nausea</b>                        | 5 to7-8 to 12      | -13.609 | 4.894 | -25.574 | -1.645  | 0.020   |
|                                      | 5 to 7- 13 to 18   | -11.120 | 5.096 | -23.578 | 1.338   | 0.096   |
|                                      | 8 to 12- 13 to 18  | 2.489   | 4.564 | -8.669  | 13.648  | 1.000   |
| <b>Procedural anxiety</b>            | 5 to7-8 to 12      | -39.617 | 7.388 | -57.679 | -21.554 | <0.001  |
|                                      | 5 to 7- 13 to 18   | -35.065 | 7.693 | -53.872 | -16.257 | <0.001  |
|                                      | 8to 12- 13 to 18   | 4.552   | 6.891 | -12.295 | 21.398  | 1.000   |
| <b>Treatment anxiety</b>             | 5 to7-8 to 12      | -16.021 | 6.083 | -30.891 | -1.150  | 0.030   |
|                                      | 5 to 7- 13 to 18   | -19.399 | 6.334 | -34.883 | -3.916  | <0.009  |
|                                      | 8 to 12- 13 to 18  | -3.379  | 5.673 | -17.248 | 10.491  | 1.000   |
| <b>Worry</b>                         | 5 to7-8 to 12      | 9.693   | 5.943 | -4.836  | 24.221  | 0.320   |
|                                      | 5 to 7- 13 to 18   | 19.426  | 6.188 | 4.299   | 34.554  | <0.007  |
|                                      | 8 to 12-13 to 18   | 9.734   | 5.543 | -3.816  | 23.284  | 0.249   |
| <b>Perceived physical appearance</b> | 5 to7-8 to 12      | 12.723  | 6.613 | -3.443  | 28.889  | 0.174   |
|                                      | 5 to 7- 13 to 18   | 6.385   | 6.885 | -10.448 | 23.218  | 1.000   |
|                                      | 8 to 12- 13 to 18  | -6.338  | 6.168 | -21.416 | 8.740   | 0.922   |
| <b>Cognitive</b>                     | 5 to7-8 to 12      | -47.687 | 8.019 | -67.291 | -28.084 | <0.001  |

|                      |                   |         |       |         |         |        |
|----------------------|-------------------|---------|-------|---------|---------|--------|
|                      | 5 to 7- 13 to 18  | -57.792 | 8.349 | -78.204 | -37.380 | <0.001 |
|                      | 8to 12- 13 to 18  | -10.105 | 7.479 | -28.389 | 8.179   | 0.541  |
| <b>Communication</b> | 5 to7-8 to 12     | -19.630 | 7.090 | -36.963 | -2.298  | <0.021 |
|                      | 5 to 7- 13 to 18  | -24.865 | 7.382 | -42.912 | -6.817  | <0.003 |
|                      | 8 to 12- 13 to 18 | -5.235  | 6.613 | -21.400 | 10.931  | 1.000  |

576 **Source:** Field Data (2022)

577 **Associated factors and Health-Related Quality of Life among**  
578 **Pediatric cancer patients(PedsQL™ 3.0)**

579 As shown in Table 23 a regression model to determine the effect of individual  
580 characteristics on the PedsQL 3.0 cancer module reports of children and parent proxy reports  
581 of quality of life. About PedsQL as perceived by pediatric cancer patients (child report). The  
582 finding indicates that the educational level of pediatric cancer patients is significantly associated  
583 with quality of life (=7.902 p<0.01), length of time since onset of disease (=2.165; p-value  
584 <0.01), and the number of siblings in the family (=2.488; p-value<0.05). The results suggest  
585 that a higher level of education, a longer survival time with cancer, and a large number of  
586 siblings increase the chance of a better quality of life. However, childhood deprivation included  
587 (= -2.175; p-value <0.01), complications related to cancer treatment (= -0.977; p-value <0.01),  
588 hospitalization in the past 3 months (= -0.747; p-value < 0.01).

589 In addition, results related to PedsQL perceived by parents/carers (parent report) show  
590 that childhood deprivation (= -1.589; p-value < 0.05), complications related to cancer treatment  
591 (= -1.159; p-value < 0.01). , hospitalization in the last 3 months (= -5.589; p-value <0.01).  
592 Therefore, the finding shows that reducing childhood deprivation, complications related to  
593 cancer, and the number of hospitalizations before 3 months increases the chance of an  
594 improvement in quality of life.

595 **Table 23. The health-related quality of life and associated factors (PedsQL™**  
596 **3.0 cancer module) (n = 84)**

| Variable              | B      | t      | 95% CI |        | P-Value |
|-----------------------|--------|--------|--------|--------|---------|
|                       |        |        | Lower  | Upper  |         |
| <b>Child report</b>   |        |        |        |        |         |
| Childhood Deprivation | -2.175 | -3.122 | -3.561 | -0.789 | 0.002   |

|                                            |        |        |         |        |       |
|--------------------------------------------|--------|--------|---------|--------|-------|
| Place of residence                         | -4.573 | -2.658 | -8.051  | -1.096 | 0.011 |
| Age of the child                           | 1.796  | 0.770  | -2.920  | 6.512  | 0.446 |
| Sex of child                               | 3.506  | 1.150  | -2.658  | 9.670  | 0.257 |
| Level of education of the child            | 7.902  | 7.302  | 5.747   | 10.056 | 0.000 |
| Work done in the past 7 days               | -7.305 | -3.491 | -11.472 | -3.138 | 0.001 |
| Hospitalization in prior 3 months          | -5.474 | -2.450 | -9.924  | -1.024 | 0.017 |
| Types of treatment the child received      | -0.454 | -0.584 | -2.025  | 1.117  | 0.563 |
| Psychosocial counseling                    | -1.760 | -0.662 | -7.135  | 3.615  | 0.512 |
| Most activity is done in the last 3 months | 0.847  | 0.946  | -0.963  | 2.657  | 0.350 |
| <b>Parent/caregiver factors</b>            |        |        |         |        |       |
| Level of education of the parent/caregiver | -0.589 | -0.375 | -3.764  | 2.585  | 0.709 |
| Employment                                 | -0.823 | -0.244 | -7.640  | 5.995  | 0.809 |
| Commence caring                            | 15.677 | 3.338  | 6.185   | 25.169 | 0.002 |

597 **Source:** Field Data (2022)

## 598 **Discussion**

599 The present study found that there is association between childhood deprivation and  
600 health related quality of life among pediatric cancer patients, while both level of childhood  
601 deprivation and health related quality were higher. However male pediatric cancer patients were  
602 many and suffering from Acute Lymphoblastic Leukemia.

603 The study results showed that acute lymphoblastic leukemia (ALL) and Hodgkin's  
604 lymphoma were the most prominent leading cancers than other types of pediatric cancers. The  
605 most affected pediatric patients were males over 7 years of age compared to female patients.  
606 This is evident as many male pediatric cancer patients of school and adolescent age were  
607 compared with females in this study. The higher proportion of ALL and Hodgkin's lymphoma  
608 observed in this study was similar to previous studies in South Africa which showed that various  
609 cancers were observed in which the majority of children diagnosed with acute lymphoblastic  
610 leukemia 12% and males were most affected [24]. However, the differences were found in  
611 latest study, the leading pediatric cancers were Wilms tumor 17.2%, retinoblastoma 16.8%,



612 and acute lymphoblastic leukemia 15.9% [11]. There was a higher incidence of male subjects,  
613 according to international data reporting that males are more likely to have cancer than females,  
614 with a 6:5 ratio for males and females [18,39]. In addition, ALL was the most common cancer  
615 observed among all types of pediatric cancers [8,24].

616 In addition, many pediatric cancer patients were diagnosed in 2021 and early 2022  
617 compared to previous years. This reflects that interventions such as childhood cancer awareness  
618 and community awareness programs were more widely implemented during this period than in  
619 previous years. In addition, priority was given to empowering healthcare providers through  
620 (short and long cancer training), in-service training, conferences, and seminars against pediatric  
621 cancer. Nervous was probably a time when there were advances in the diagnosis of pediatric  
622 cancer, resulting in a rising number of children being diagnosed and confirmed with cancer in  
623 Tanzania. However, only a few conducted studies reported that the mean time since diagnosis  
624 increased significantly after the advancement of pediatric cancer therapies such as multiple  
625 chemotherapies, surgery, radiotherapy, and psychosocial therapy [7]. Pediatric cancer patients  
626 were treated in more than 4 hospitals seeking treatment while the cancer symptoms were pre-  
627 diagnosis, with the majority of them, referred to MNH for diagnosis confirmation and treatment,  
628 resulting in late diagnosis and treatment as most of them took more than 2 weeks to arrive at  
629 the treatment center. This finding, also shown in previous studies, showed that about 74.5% of  
630 pediatric cancer patients live more than 4 hours to reach the cancer centers [11]. This is one of  
631 the factors contributing to being late in diagnosis, delaying cancer treatment can lead to early  
632 cancer complications, and early infant mortality since most pediatric cancer patients came from  
633 disadvantaged areas. [3,11], because of onset at a late stage of cancer.

634 Regarding the frequency of hospitalizations, most adolescent pediatric cancer patients were  
635 admitted 1 to 3 times prior to 3 months, which may be due to complications related to cancer  
636 itself and treatments. The result was consistent with a few studies conducted in which frequency  
637 of admission is related to concern [18]. Despite advances in cancer therapy that maximize  
638 survival time, pediatric cancer patients experience abdominal pain, fever, and palpitations  
639 during cancer treatment. As reported by many studies, most children with cancer face problems  
640 related to cancer and its therapy, including pain, nausea, vomiting, and physical incapacity  
641 leading to weakened immunity [28,29]. School/study events were the most activities performed  
642 by pediatric cancer patients in the last 3 months after play/excise and the few could not do any

643 activities because they have a physical disability (handicap) due to cancer and they Delay in  
644 treatment and intervention.

645 In this study, the Multidimensional Poverty Index (MPI) was used to assess the level of  
646 childhood disadvantage in 84 of 91 pediatric cancer patients. The results of this study show that  
647 childhood deprivation was significantly higher in pediatric cancer patients as the proportion of  
648 deprived was larger than non-deprived, which is attributed to most of them missing their  
649 educational development while going to the hospital for treatment, frequency of admission, and  
650 informal employment of their parents and caregivers continued. The results were similar to  
651 previous demographic surveys: 50.2% of all children worldwide suffered from extreme poverty  
652 in terms of education, health, and nutrition, while 31% in sub-Saharan Africa were  
653 multidimensionally poor [15]. However, no significant difference was observed regarding the  
654 sex of the pediatric cancer patients, but the overall mean of the female patients was slightly  
655 higher compared to the male pediatric cancer patients, which may be due to the small number  
656 of female podiatry cancer patients participating in this study. However, about 12% of male  
657 children in Tanzania were disadvantaged in more than three essential needs, including early  
658 school dropping, health, and nutrition [15]

659 This study found that childhood cancer occurs in rural areas, has low levels of education,  
660 visits more than 4 hospitals while seeking treatment, and is significantly disadvantaged in single  
661 parent/carer living. However, the results showed a significant association between the standard  
662 of living and health. The difference was observed in place of residence between urban and rural  
663 and peri-urban and rural, while mean total scores were high for pediatric cancer patients living  
664 in rural areas compared to urban and peri-urban areas. Similar results of other studies from the  
665 2016 NBS and UNICEF survey showed that about 81% of children living in rural areas are 3  
666 and more disadvantaged, while few of them are in poverty (rural) areas compared to urban areas  
667 life [13]. In addition, children living in rural areas suffering from chronic diseases have been  
668 disadvantaged in more than basic needs compared to those living in urban [16]. Furthermore,  
669 few studies documented that most pediatric cancer patients living in non-deprived areas had  
670 more likely to have better health and improve their disease status to increase the survivors  
671 [40], compared to those coming from deprived areas or rural areas.

672 Time to start medication was significantly associated with childhood deprivation, as most  
673 pediatric cancer patients were delayed in arriving at cancer treatment centers. they took more

674 than 2 weeks to start cancer medication after diagnosis of the types of cancer compared with  
675 previous finding access to cancer treatment centers and improving treatment modalities in  
676 national hospitals are important in delaying cancer treatment [3]. However, the findings  
677 suggested that there was no statistical difference either in gender or age among pediatric cancer  
678 patients as also reported in a previous study that there is no association between deprivation  
679 and gender or age group [41].

680 In this PedsQL study, the generic core module 4.0 was used to assess the health-related  
681 quality of life of 84 of 91 pediatric cancer patients aged 5 to 18 years whose parents/carers  
682 attended oncology clinics for treatment and other interventions. The results showed that the  
683 mean HRQoL scores perceived by pediatric cancer patients were lower in PedsQL inventory.  
684 Cancer is among the factors that have been perceived to contribute to the impairment of physical  
685 and school functioning in pediatric cancer patients. Male pediatric cancer patients are the most  
686 vulnerable group affected in both physical and school functioning, as their numbers were higher  
687 than female pediatric cancer patients in this study. Physical disability of pediatric cancer  
688 patients accompanied by school affection. Similar results were reported in previous studies,  
689 male pediatric cancer patients were the most prominent group discharged because of physical  
690 problems, seeking cancer treatment, and frequent admission to their school [18,24]

691 Furthermore, pediatric cancer patients aged 5-7 years were perceived as having physical  
692 and school functioning problems, while other groups were perceived only as having school  
693 functioning problems. HRQoL corresponding to age group implies that pediatric cancers are  
694 associated with better quality of life in older than younger pediatric cancer patients. In addition,  
695 most of them had not attended school because they did not feel well connected to cancer and  
696 its treatments and went to the doctor or hospital. However, participated in various activities in  
697 the last three months, including school/study, which is reliable with the current study not  
698 attending school for < months and continued in the last 30 days [24].

699 The similarity is also suggested by a study conducted in the US and Chile, in which pediatric  
700 cancer patients in Chile during the active phase of treatment and returning to school during their  
701 cancer treatment had a lower mean score. For all US school cancer treatment courses School  
702 functioning were the greatest impact on affecting the quality of life in pediatric cancer patients  
703 and the dissimilarity observed in the US, where there was a higher mean school functioning  
704 score throughout the treatment course [25]. The result suggests that there is a difference

705 between countries' scores on quality of life improvement and the impact of educational support.  
706 In addition, starting school and regular school attendance are believed to affect growth and  
707 development [10].

708 In this study, a linear regression analysis was performed to determine the impact of  
709 individual characteristics on HRQoL in pediatric cancer patients. Pediatric cancer patients, how  
710 were they disadvantaged, place of residence, participation in work/any activities in the last 7  
711 days, their HRQoL were impaired resulting in poor quality of life (QoL). Poor health, the  
712 standard of living, and living in rural areas are the factors that contribute most to Poor QoL in  
713 pediatric cancer patients in this study. However, the results are consistent with recent studies  
714 suggesting that all children with cancer living in disadvantaged and rural areas are likely to  
715 impact poor QoL and experience a better quality of life if their socioeconomic status is  
716 improved [22,43].

717 However, the results obtained show that pediatric cancer patients who were female, school  
718 age, and adolescents (over 7 years) with higher education levels were perceived as having a  
719 better quality of life in both the child report and the parent proxy report. The results suggest  
720 that the age of pediatric cancer patients is more likely to affect the quality of life if it contributes  
721 to the normal developmental milestone even during the disease. However, younger age (5-7)  
722 years is associated with poor quality of life, which the child perceives in terms of physical  
723 functioning. This finding is the same as previous studies, which found that most pediatric  
724 patients diagnosed with cancer at a younger age had a poor observed quality of life [18,44].  
725 This finding reinforces the importance of preventing the physical disability and dysfunction  
726 associated with cancer treatment and the disease itself.

727 In addition, the study was statistically significant in terms of perceived disease severity  
728 in pediatric cancer patients, who had lower overall mean. Procedural anxiety, cognitive  
729 problems, and communication problems were the critical problems perceived by pediatric  
730 cancer patients. Pediatric cancer patients rely on their parents/caregivers to provide their health  
731 information on their behalf. However, differences in three subscales, including nausea,  
732 procedural anxiety, and cognitive problems, were seen in the reports of children aged 8-12 and  
733 13-18 compared to 5-7 years in this study. The observed outcome is no different from the  
734 current study, which found that younger-aged pediatric cancer patients were statistically  
735 associated with poor health-related quality of life on the fear of procedures subscale [18]. This

736 finding underscores the importance of preventing the anxiety associated with medical  
737 intervention during cancer treatment. Procedural anxiety can be distressing pediatric cancer  
738 patients, making treatment difficult

739 Therefore, the results are likely contributed by other causes such as dissimilarity in  
740 developmental factors. In addition, the association was observed in the communication range,  
741 which was below the cutoff mean (69.7) in each age group. The same result was found in other  
742 studies that the communication range of pediatric cancer patients was considered difficult to  
743 interact with healthcare providers (Tembe, 2021). Additionally, most research on  
744 communication in childhood cancer has focused on parents/caregivers or healthcare providers  
745 rather than the patients themselves. Therefore, studies have suggested that understanding  
746 pediatric cancer patients require a healthcare provider to facilitate effective communication  
747 (patient-provider) which could improve quality of life and client satisfaction (Lin et al., 2020)  
748 through early intervention and reduce the impact of cancer therapies complication

749 The lower mean was found for pain and injury, nausea, and treatment anxiety perceived  
750 by pediatric cancer patients aged 5-7 years. In addition, a dissimilarity was found in the  
751 cognitive domain of the children's report, where the mean score was lower at ages 5-7 than at  
752 ages 8-12 and 13-18, which is similar to other studies (Bishop et al., 2018; Tembe, 2021). . In  
753 addition, another analysis was performed (Bonferroni alpha post hoc test) to find out the  
754 difference between the age groups of the pediatric cancer patients, with the finding being  
755 consistent between the age groups (5-7 and 13-18; 5-7 and 13-18 ) significant was treatment  
756 anxiety. This may be related to a lack of patient orientation by healthcare providers and the  
757 developmental characteristics of children. In addition, cognitive problems have been observed  
758 between the ages of 5 and 7 years that being younger and being diagnosed with cancer can  
759 affect the quality of life, which is because most pediatric cancer patients do not attend school  
760 and spend most of their time in hospital spending.

761 In this study, a linear regression analysis was performed to determine the impact of  
762 individual characteristics on HRQoL in pediatric cancer patients. Pediatric cancer patients, how  
763 were they disadvantaged, place of residence, participation in work/any activities in the last 7  
764 days, their HRQoL were impaired resulting in poor quality of life (QoL). Poor health, the  
765 standard of living, and living in rural areas are the factors that contribute most to Poor QoL in  
766 pediatric cancer patients in this study. However, the results are consistent with recent studies

767 suggesting that all children with cancer living in disadvantaged and rural areas are likely to  
768 impact poor QoL and experience a better quality of life if their socioeconomic status is  
769 improved [22,44].

770 However, the results obtained show that pediatric cancer patients who were female,  
771 school age, and adolescents (over 7 years) with higher education levels were perceived as  
772 having a better quality of life. The results suggest that the age of pediatric cancer patients is  
773 more likely to affect the quality of life if it contributes to the normal developmental milestone  
774 even during the disease. However, younger age (5-7) years is associated with poor quality of  
775 life, which the child perceives in terms of physical functioning. This finding is the same as  
776 previous studies, which found that most pediatric patients diagnosed with cancer at a younger  
777 age had a poor observed quality of life [10,18]. This finding reinforces the importance of  
778 preventing the physical disability and dysfunction associated with cancer treatment and the  
779 disease itself. In addition, the regression model showed a significant association with quality of  
780 life (PedsQLTM 3.0 inventory) in both the child's report and the parent's proxy report.

781 The finding shows that the child's age, hospitalization within the last 3 months, childhood  
782 deprivation, and school attendance were perceived as serious, and in the parent representative's  
783 report the observed outcome was significant for hospitalization within the last 3 months and  
784 school attendance. The results may suggest that age, frequent hospitalizations, childhood  
785 deprivation, and irregular school attendance are important determinants of improved quality of  
786 life in pediatric cancer patients. However, most of the deprived pediatric cancer patients failed  
787 to attend school after frequent hospitalizations [44]. However, this study has discover that the  
788 childhood deprivation is higher which lead to lower quality of life among pediatric cancer  
789 patients related to delay treatment due to living in rural areas where there is limited of cancer  
790 centers and poor standard of living,

## 791 **Strength and limitation of the study**

792 This study has discover that the childhood deprivation is higher which lead to lower  
793 quality of life among pediatric cancer patients related to delay treatment due to living in rural  
794 areas where there is limited of cancer centers and poor standard of living. The study did not  
795 rely on examining the clinical presentation factors associated with HRQoL. Also, the generality  
796 of this study may be limited by inclusion and exclusion criteria, particularly with regard to age,  
797 which did not involve pediatric cancer patients younger than 5 years of age and not able to

798 understand and communicate verbally, and those who have been diagnosed with cancer and  
799 started or completed cancer treatment. Information bias can be observed after the Parent Proxy  
800 Report on Childhood Deprivation and Health-Related Quality of Life.

## 801 **Conclusion**

802 The magnitude of acute lymphoblastic leukemia is higher among pediatric cancer  
803 patients. There was a significant link between pediatric cancers and childhood deprivation and  
804 thus, compromised quality of life among pediatric cancer patients. Innovative pediatric cancer  
805 care policies, guidelines, and or strategies may need to be advocated to address the problem  
806 accordingly.

## 807 **Suggestions**

808 Future research to maximize the size of the study by recruiting a large sample is needed  
809 to investigate routine clinical factors that may affect improving QOL outcomes using sensitivity  
810 measures during the treatment of pediatric cancer patients that provide important information  
811 for early information of healthcare providers about treatment decisions represent intervention.

## 812 **Supporting information**

813 Dataset available, shared upon request

## 814 **Conflicts of Interest**

815 The authors has no conflicts of interest relevant to this article.

## 816 **Acknowledgments**

817 The authors express gratitude to the University of Dodoma for providing ethical clearance to  
818 conduct this study. We also thank the Muhimbili National Hospital administration for  
819 allowing us to conduct the study, also we thank the pediatric cancer patients and their  
820 parents/caregivers for volunteering to participate in this study fully till the end.

## 821 **Author Contributions**

822 Conceptualization: Mwanaheri Chubi.

823 Data curation: Mwanaheri Chubi

824 Formal analysis: Mwanaheri Chubi.

- 825 Methodology: Mwanaheri Chubi.
- 826 Supervision: Stephen Kibusi, Lulu Chirande and Shakiru Jumanne.
- 827 Varidation : Mwanaheri Chubi
- 828 Writing: original draft: Mwanaheri Chubi.
- 829 Writing: review & editing: Stephen Kibusi, Lulu Chirande and Shakiru Jumanne.
- 830 Funding: This research received no external funding
- 831



832 **REFERENCE**

- 833 1. WHO. CureAll framework. WHO global initiative for childhood cancer: increasing  
834 access, advancing quality, saving lives. World Health Organization. 2021.
- 835 2. Zhang A, Wang K, Zebrack B, Tan CY, Walling E, Chugh R. Psychosocial, behavioral,  
836 and supportive interventions for pediatric, adolescent, and young adult cancer survivors:  
837 A systematic review and meta-analysis. *Crit Rev Oncol Hematol* [Internet].  
838 2021;160(October 2020):103291. Available from:  
839 <https://doi.org/10.1016/j.critrevonc.2021.103291>
- 840 3. Schroeder K, Saxton A, McDade J, Chao C, Masalu N, Chao C, et al. Pediatric cancer in  
841 northern Tanzania: Evaluation of diagnosis, treatment, and outcomes. *J Glob Oncol*.  
842 2018;2018(4).
- 843 4. Geel JA, Challinor J, Ranasinghe N, Myezo KH, Eyal KC, Aderounmu W, et al. Pediatric  
844 cancer care in Africa: SIOP Global Mapping Program report on economic and  
845 population indicators. *Pediatr Blood Cancer*. 2021;68(11):1–9.
- 846 5. Boyle P, Ngoma T, Sullivan R, Ndlovu N, Autier P, Stefan C, et al. State of Oncology  
847 in Africa 2015 [Internet]. 2016. 1–298 p. Available from: [http://www.i-pri.org/wp-](http://www.i-pri.org/wp-content/uploads/2017/02/STATE-OF-ONCOLOGY-IN-AFRICA-2015-WEB-VERSION.pdf)  
848 [content/uploads/2017/02/STATE-OF-ONCOLOGY-IN-AFRICA-2015-WEB-](http://www.i-pri.org/wp-content/uploads/2017/02/STATE-OF-ONCOLOGY-IN-AFRICA-2015-WEB-VERSION.pdf)  
849 [VERSION.pdf](http://www.i-pri.org/wp-content/uploads/2017/02/STATE-OF-ONCOLOGY-IN-AFRICA-2015-WEB-VERSION.pdf)
- 850 6. Geel JA, Ranasinghe N, Myezo KH, Davidson A, Howard SC, Hessissen L, et al.  
851 Pediatric cancer care in Africa: SIOP Global Mapping process. *Pediatr Blood Cancer*.  
852 2021;68(11).
- 853 7. Karimi M, Cox AD, White S V., Karlson CW. Fatigue, Physical and Functional Mobility,  
854 and Obesity in Pediatric Cancer Survivors. *Cancer Nurs*. 2020;43(4):E239–45.
- 855 8. Joko-Fru WY, Parkin DM, Borok M, Chokunonga E, Korir A, Nambooze S, et al.  
856 Survival from childhood cancers in Eastern Africa: A population-based registry study.  
857 *Int J Cancer*. 2018 Nov 15;143(10):2409–15.
- 858 9. Kayungu SJ. Finding an optimal treatment regimen for endemic Burkitt’s lymphoma in  
859 a limited resource setting: A historical comparison of an INCTR-03-06 protocol for  
860 children treated at a tertiary pediatric oncology unit in Tanzania. *J Clin Oncol*.

- 861 2020;38(15\_suppl):e22507–e22507.
- 862 10. Pan HT, Wu LM, Wen SH. Quality of Life and Its Predictors among Children and  
863 Adolescents with Cancer. *Cancer Nurs.* 2017;40(5):343–51.
- 864 11. Maillie L, Mutagonda A, Chirande L, Rehema L, Jumanne S, Meleki E, et al. Abstract  
865 101: The Tanzanian Pediatric Cancer Network: A Comprehensive Evaluation of the  
866 Incidence of Presenting Patients and Access to Pediatric Cancer Care in Tanzania. In  
867 2021. p. 101–101.
- 868 12. WHO. Global initiative for childhood cancer [Internet]. 2020. Available from:  
869 <https://www.who.int/publications/m/item/global-initiative-for-childhood-cancer>
- 870 13. NBS & UNICEF. Child Poverty in Tanzania National Bureau of Statistics and United  
871 Nations Children’s Fund THE UNITED REPUBLIC OF TANZANIA [Internet]. 2016.  
872 Available from: [https://www.unicef.org/esa/sites/unicef.org.esa/files/2018-09/UNICEF-](https://www.unicef.org/esa/sites/unicef.org.esa/files/2018-09/UNICEF-Tanzania-2016-Child-Poverty.pdf)  
873 [Tanzania-2016-Child-Poverty.pdf](https://www.unicef.org/esa/sites/unicef.org.esa/files/2018-09/UNICEF-Tanzania-2016-Child-Poverty.pdf)
- 874 14. Poulalhon C, Goujon S, Marquant F, Faure L, Guissou S, Bonaventure A, et al. Factors  
875 associated with 5- and 10-year survival among a recent cohort of childhood cancer  
876 survivors (France, 2000–2015). *Cancer Epidemiol.* 2021;73(June).
- 877 15. NBS & UNICEF. Child Poverty in TANZANIA [Internet]. 2019. Available from:  
878 [https://www.unicef.org/tanzania/media/2106/file/UNICEF-Tanzania-Child-Poverty-](https://www.unicef.org/tanzania/media/2106/file/UNICEF-Tanzania-Child-Poverty-Report-2019.pdf)  
879 [Report-2019.pdf](https://www.unicef.org/tanzania/media/2106/file/UNICEF-Tanzania-Child-Poverty-Report-2019.pdf)
- 880 16. Lwidiko A, Kibusi SM, Nyundo A, Mpondo BCT. Association between HIV status and  
881 depressive symptoms among children and adolescents in the Southern Highlands Zone,  
882 Tanzania: A case-control study. *PLoS One.* 2018 Feb 1;13(2).
- 883 17. Zainal NR, Kaur G, Ahmad NA, Khalili JM. Housing Conditions and Quality of Life of  
884 the Urban Poor in Malaysia. *Procedia - Soc Behav Sci.* 2012;50(July 2012):827–38.
- 885 18. Alabbas F, Elyamany G, Alkhayat N, AlShahrani M, Ibrahim W, Elborai Y, et al.  
886 Assessment of Health-related Quality of Life in Saudi Children with Cancer. *Heal Serv*  
887 *Insights.* 2021;14:117863292110293.
- 888 19. MoHSW. National Cancer Control Strategy (NCCS) 2013 - 2022. 2013. 2013;72.

- 889 20. Ahmad AA, Saburi E, Rajaei T, Mortazavi Y, Thomas X, Chelghoum Y, et al. Types of  
890 cancer that develop in children. *Anticancer Res* [Internet]. 2018;9(1):1–2. Available  
891 from:  
892 <https://link.springer.com/content/pdf/10.1023/A:1010062929140.pdf>  
893 [http://0-ovidsp.ovid.com.wam.city.ac.uk/ovidweb.cgi?T=JS&PAGE=reference&D=emed10&](http://0-ovidsp.ovid.com.wam.city.ac.uk/ovidweb.cgi?T=JS&PAGE=reference&D=emed10&NEWS=N&AN=40807300)  
894 [NEWS=N&AN=40807300](https://www.ledsmagazine.com/articles/print/volume-15/issue-5/features/developer-foru)  
895 [https://www.ledsmagazine.com/articles/print/volume-](https://www.ledsmagazine.com/articles/print/volume-15/issue-5/features/developer-foru)
- 896 21. Sung L, Klaassen RJ, Dix D, Pritchard S, Yanofsky R, Dzolganovski B, et al.  
897 Identification of paediatric cancer patients with poor quality of life. *Br J Cancer*.  
898 2009;82–8.
- 899 22. Kim J, Park E. Impact of socioeconomic status and subjective social class on overall and  
900 health-related quality of life. *BMC Public Health* [Internet]. 2015; Available from:  
901 <http://dx.doi.org/10.1186/s12889-015-2014-9>
- 902 23. Varni JW, Panepinto JA. Cognitive functioning, patient health communication, and  
903 worry mediate pain predictive effects on health-related quality of life in youth with sickle  
904 cell disease. *Pediatr Blood Cancer*. 2020 Nov 1;67(11).
- 905 24. Tembe SC. The Health-Related Quality of Life of South African Paediatric In-patients  
906 with Cancer. *South African J Occup Ther*. 2021;51(1):44–53.
- 907 25. Bishop MW, Billups CA, Gattuso JS, Bishop MW, Advani SM, Daw NC, et al. Health-  
908 related quality of life and survival outcomes of pediatric patients with nonmetastatic  
909 osteosarcoma treated in countries with different resources. *J Glob Oncol*.  
910 2018;2018(4):1–11.
- 911 26. Tumaini la Maisha. Curing Children’s cancer in Tanzania: 2015-2020 [Internet]. 2020.  
912 Available from: [https://www.ucd.ie/t4cms/TLM PDF.pdf](https://www.ucd.ie/t4cms/TLM%20PDF.pdf)
- 913 27. Directrelief. In Sub-Saharan Africa, Childhood Cancer Is Often Deadly. A New Initiative  
914 Is Working to Change That. 2020.
- 915 28. Kohi TW, Von Essen L, Masika GM, Gottvall M, Dol J. Cancer-related concerns and  
916 needs among young adults and children on cancer treatment in Tanzania: A qualitative  
917 study 11 Medical and Health Sciences 1117 Public Health and Health Services. *BMC*

- 918 Cancer. 2019 Jan 17;19(1).
- 919 29. Masika GM, Gottvall M, Kohi TW, Von Essen L, Dol JS. Concerns and Needs of  
920 Support among Guardians of Children on Cancer Treatment in Dar es Salaam: A  
921 Qualitative Study. *Cancer Nurs.* 2020;43(6):E342–8.
- 922 30. Hydeman JA, Uwazurike OC, Adeyemi EI, Beaupin LK. Survivorship needs of  
923 adolescent and young adult cancer survivors: a concept mapping analysis. *J Cancer*  
924 *Surviv.* 2019 Feb 15;13(1):34–42.
- 925 31. Riaz N, Wolden SL, Gelblum DY, Eric J. Survivors of Childhood/Adolescent Cancer:  
926 Life-long Risks and Responsibilities. 2016;118(24):6072–8.
- 927 32. Ministry of Health and Social Welfare (MoHSW) [Tanzania Mainland], Ministry of  
928 Health (MoH) [Zanzibar], (NBS) NB of S, Statistician(OCGS) O of the CG, International  
929 I. Tanzania Service Provision Assessment. 2015;502. Available from:  
930 <https://dhsprogram.com/pubs/pdf/spa22/spa22.pdf>
- 931 33. National Malaria Control Programme -Ministry of Health. Tanzania Malaria Indicator  
932 Survey 2017 - Final Report. 2017; Available from:  
933 <https://dhsprogram.com/publications/publication-mis31-mis-final-reports.cfm>
- 934 34. Abraham ZS, Massawe ER, Kahinga AA, Mapondella KB, Massawe WA, Swai H, et al.  
935 Clinical Profile of Paediatric Head and Neck Cancers at a Tertiary Hospital in Tanzania.  
936 *Rwanda J Med Heal Sci.* 2020 Apr 14;3(1):11–20.
- 937 35. Varni JW, Limbers CA, Burwinkle TM. Parent proxy-report of their children’s health-  
938 related quality of life: An analysis of 13,878 parents’ reliability and validity across age  
939 subgroups using the PedsQL™ 4.0 Generic Core Scales. *Health Qual Life Outcomes.*  
940 2007;5:1–10.
- 941 36. UN General Assembly. A/RES/61/146 Rights of the child. Vol. 1974. 2007.
- 942 37. Limbers CA, Ripperger-Suhler J, Heffer RW, Varni JW. Patient-reported pediatric  
943 quality of life inventory™ 4.0 generic core scales in pediatric patients with attention-  
944 deficit/hyperactivity disorder and comorbid psychiatric disorders: Feasibility, reliability,  
945 and validity. *Value Heal.* 2011;14(4):521–30.
- 946 38. López León A, Carreño Moreno S, Arias-Rojas M. Relationship Between Quality of Life

- 947 of Children With Cancer and Caregiving Competence of Main Family Caregivers. *J*  
948 *Pediatr Oncol Nurs*. 2021;38(2):105–15.
- 949 39. EL Hajjar ST, Alkhanaizi MS. Exploring the Factors That Affect Employee Training  
950 Effectiveness: A Case Study in Bahrain. *SAGE Open* [Internet]. 2018;8(2). Available  
951 from: <https://journals.sagepub.com/doi/epub/10.1177/2158244018783033>
- 952 40. Ul Hadia N, Abdullah N, Sentosa I. An Easy Approach to Exploratory Factor Analysis:  
953 Marketing Perspective. *J Educ Soc Res* [Internet]. 2016;6(1):215–23. Available from:  
954 [https://www.researchgate.net/publication/290042054\\_An\\_Easy\\_Approach\\_to\\_Exploratory\\_Factor\\_Analysis\\_Marketing\\_Perspective\\_Noor\\_Ul\\_Hadi](https://www.researchgate.net/publication/290042054_An_Easy_Approach_to_Exploratory_Factor_Analysis_Marketing_Perspective_Noor_Ul_Hadi)
- 956 41. American Cancer Society. Treating Children with Cancer. *Am Cancer Soc* [Internet].  
957 2016;1–4. Available from: <https://www.cancer.org/cancer/cancer-in-children/how-are-childhood-cancers-treated.html>(accessed 19/7/2022)
- 959 42. Régnier Denois V, Bourmaud A, Nekaa M, Bezzaz C, Bousser V, Kalecinski J, et al.  
960 The impact of social inequalities on children’s knowledge and representation of health  
961 and cancer Véronique. *Eur J Pediatr* [Internet]. 2018;177(8):1219–30. Available from:  
962 <https://pubmed.ncbi.nlm.nih.gov/29808238/>
- 963 43. Taralee Hamner, Robert D. Latzman, Natasha E. Latzman, T. David Elkin and SM.  
964 Quality of Life Among Pediatric Patients With Cancer: Contributions of Time Since  
965 Diagnosis and Parental Chronic Stress. *Pediatr Blood Cancer* [Internet].  
966 2015;62(7):1232–1236. Available from:  
967 <https://onlinelibrary.wiley.com/doi/abs/10.1002/pbc.25468>
- 968 44. H Adıgüzel, I Ergin, Z Ocek RD. Influence of deprivation on health-related quality of  
969 life in children: Cross sectional study, Turkey. *Eur J Public Health* [Internet].  
970 2018;28(4):485–6. Available from:  
971 [https://academic.oup.com/eurpub/article/28/suppl\\_4/cky218.224/5192239](https://academic.oup.com/eurpub/article/28/suppl_4/cky218.224/5192239) accessed on  
972 7/20/2022
- 973 45. Pan H, Wu L, Wen S. Quality of Life and Its Predictors Among Children and Adolescents  
974 With Cancer. *Cancer Nurs* [Internet]. 2016;00(0):1–9. Available from:  
975 [https://journals.lww.com/cancernursingonline/Fulltext/2017/09000/Quality\\_of\\_Life\\_and\\_Its\\_Predictors\\_Among\\_Children.2.aspx](https://journals.lww.com/cancernursingonline/Fulltext/2017/09000/Quality_of_Life_and_Its_Predictors_Among_Children.2.aspx)



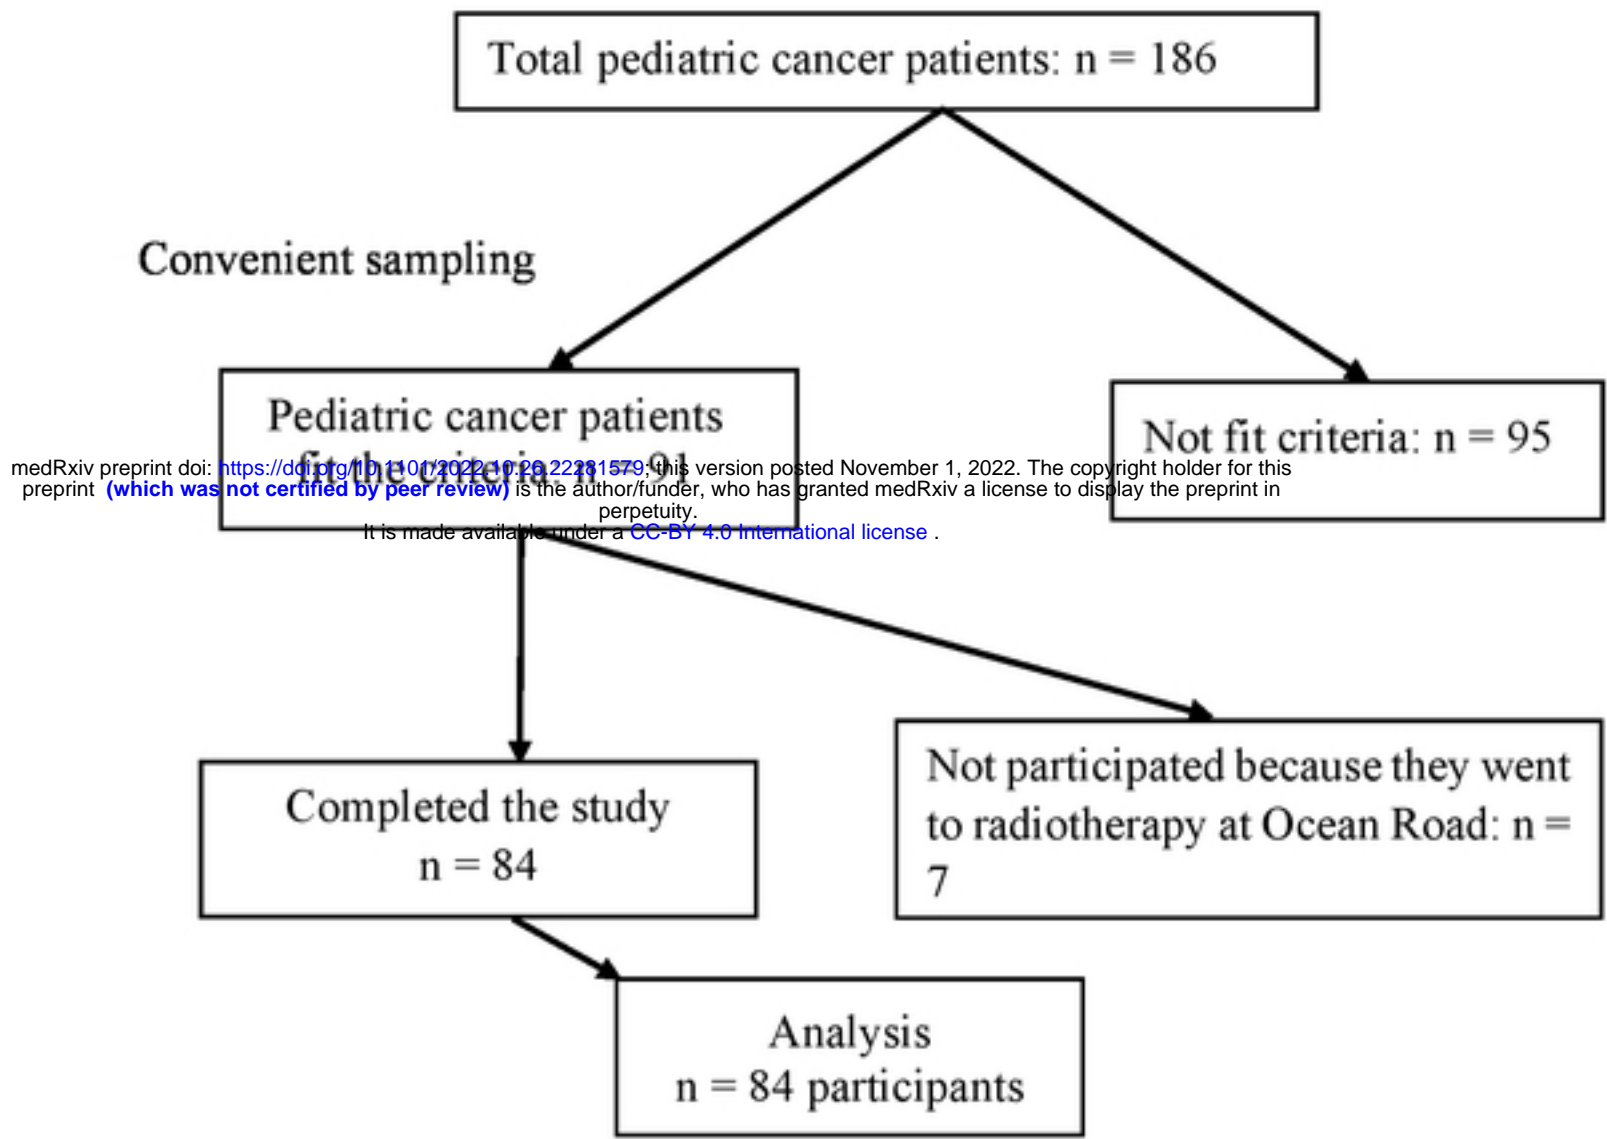

**Fig 1: Flow diagram representing sampling procedure and sample size**

## Level of childhood deprivation

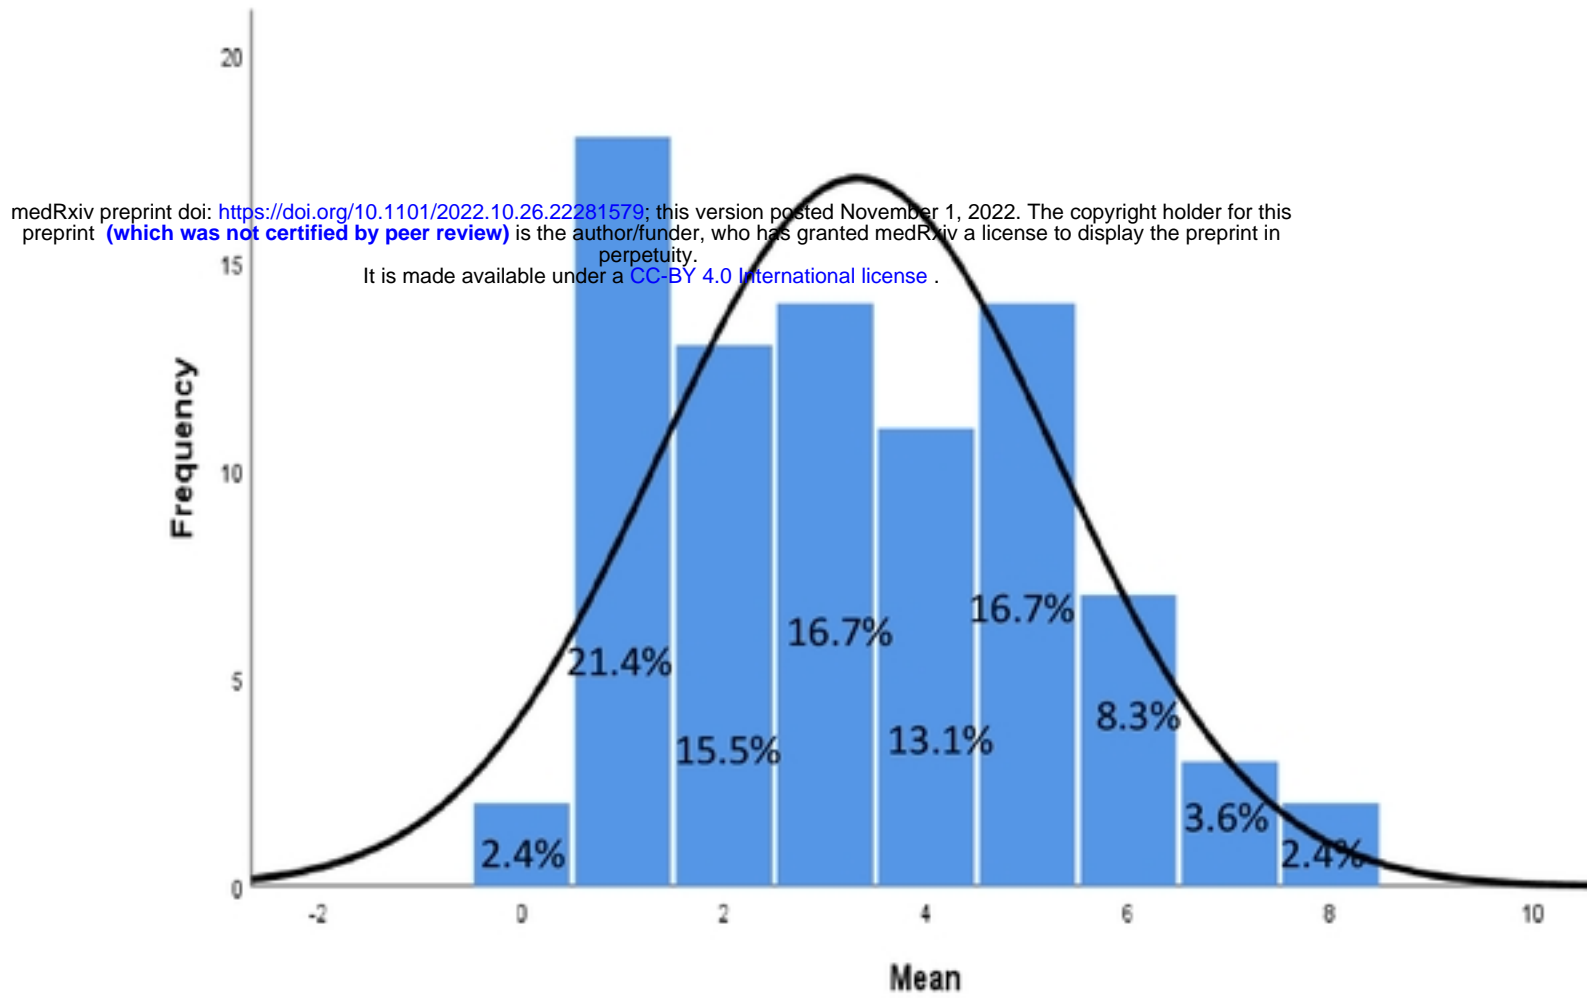

Fig 1: Histogram showing the level of childhood deprivation by mean score among pediatric cancer patients
